# Supplementary material
Source: PubMed Central journal article supplement (PMC8443232)
Supplement: mmc1.pdf [file mmc1.pdf]

# THE LANCET

## Infectious Diseases

### Supplementary appendix 1

This translation in Chinese was submitted by the authors and we reproduce it as supplied. It has not been peer reviewed. *The Lancet's* editorial processes have only been applied to the original in English, which should serve as reference for this manuscript.

Supplement to: Xia SL, Zhang, YT Wang YX, et al. Safety and immunogenicity of an inactivated COVID-19 vaccine, BBIBP-CorV, in people younger than 18 years: a randomised, double-blind, controlled, phase 1/2 trial. *Lancet Infect Dis* 2021; published online Sept 15. [https://doi.org/10.1016/S1473-3099\(21\)00462-X](https://doi.org/10.1016/S1473-3099(21)00462-X).

此简体中文译文由作者提交，我方按照提供的版本刊登。此译文并未经过同行审阅。医学期刊《柳叶刀》的编辑流程仅适用于英文原稿，英文原稿应作为此手稿的参考。

## 背景

尽管 SARS-CoV-2 感染在儿童和青少年中通常会引起较轻的症状，但年轻人可能仍会在 SARS-CoV-2 传播中发挥关键作用。因此，一种有效的儿童和青少年疫苗可以帮助控制疾病流行。为了进一步评估的 COVID-19 灭活疫苗 BBIBP-CorV，我们在 3~17 岁参与者中评估了 BBIBP-CorV 的安全性和免疫原性。

## 方法

在中国河南省商丘市梁园区疾病预防控制中心进行了一项随机、双盲、对照的 I/II 期临床试验中，健康参与者根据年龄（3~5 岁、6~12 岁或 13~17 岁）和剂量组进行分层。有 SARS-CoV-2 或 SARS-CoV 感染史的个体被排除在外。所有参与者都使用分层区组随机化（区组大小为 8）随机分配接受三剂 2/4/8  $\mu\text{g}$  疫苗或对照（比例为 1:1:1:1），每剂间隔 28 天。主要终点是基于安全性数据集分析的安全性，该数据集由随机分配后至少接受过一次疫苗接种并具有任何安全性评估信息的参与者组成。次要终点是针对 SARS-CoV-2 活病毒的中和抗体的几何平均滴度 (GMT)。这项研究仍在进行中，并在 [www.chictr.org.cn](http://www.chictr.org.cn) 注册，注册号 ChiCTR2000032459。

## 结果

在 2020 年 8 月 14 日至 2020 年 9 月 24 日，I 期临床试验对 445 名参与者进行了筛查，288 名合格的受试者被随机分配到疫苗组 ( $n=216$ ，3~5、6~12 和 13~17 岁年龄组的 2/4/8  $\mu\text{g}$  每剂量组 24 人) 或对照 ( $n=72$ ，3~5、6~12 和 13~17 岁三个年龄组各 24 人)。II 期临床试验对 810 名参与者进行了筛查，720 名合格的参与者被随机分配并分配到疫苗组 ( $n=540$ ，3~5、6~12 和 13~17 岁年龄组的 2/4/8  $\mu\text{g}$  每个剂量组 60 人) 或对照 ( $n=180$ ，3~5、6~12 和 13~17 岁每个年龄组 60 人)。最常见

的注射部位不良反应是疼痛[3~5 岁疫苗组 251 名受试者中有 10 人 (4%); 6~12 岁疫苗组 252 名受试者中有 23 人 (9.1%) 和对照组 84 名受试者中 1 人 (1.2%); 13~17 岁疫苗组 252 名受试者中有 20 人 (7.9%) ]。最常见的全身不良反应是发热[3~5 岁疫苗组 251 名受试者中有 32 人 (12.7%), 对照组 84 名受试者中有 6 人 (7.1%); 6~12 岁疫苗组 252 名受试者中有 13 人 (5.2%), 对照组 84 名受试者中的 1 人 (1.2%); 13~17 岁疫苗组 252 名受试者中有 26 人 (10.3%), 对照组的 84 名受试者中有 8 人 (9.5%) ]。不良反应的严重程度多为轻度至中度。在第二剂接种后 28 天, 针对 SARS-CoV-2 活病毒的中和抗体 GMT 在 3~5 岁组为 105.3~180.2, 在 6~12 岁组为 84.1~168.6, 13~17 岁组为 88.0~155.7; 在第三剂接种后 28 天, 在 3~5 岁组为 143.5~224.4, 在 6~12 岁组为 127~184.8, 在 13~17 组为 150.7 ~199。

## 结论

COVID-19 灭活疫苗 BBIBP-CorV 在 3-17 岁参与者的所有测试剂量水平下都是安全且耐受性良好的。在接种两剂 BBIBP-CorV 后可引发针对 SARS-CoV-2 的强烈体液免疫反应。我们的研究结果支持使用 4 $\mu$ g 剂量 BBIBP-CorV, 两次免疫方案, 在 18 岁以下人群开展 3 期临床试验, 以进一步确定其对 COVID-19 的安全性和保护效力。
