# Supplementary material
Source: PubMed Central journal article supplement (PMC8443232)
Supplement: mmc2.pdf [file mmc2.pdf]

# THE LANCET

## Infectious Diseases

### Supplementary appendix 2

This appendix formed part of the original submission and has been peer reviewed.  
We post it as supplied by the authors.

Supplement to: Xia SL, Zhang, YT Wang YX, et al. Safety and immunogenicity of an inactivated COVID-19 vaccine, BBIBP-CorV, in people younger than 18 years: a randomised, double-blind, controlled, phase 1/2 trial. *Lancet Infect Dis* 2021; published online Sept 15. [https://doi.org/10.1016/S1473-3099\(21\)00462-X](https://doi.org/10.1016/S1473-3099(21)00462-X).

## Appendix

|                                                                                                                                                                                                    |    |
|----------------------------------------------------------------------------------------------------------------------------------------------------------------------------------------------------|----|
| Appendix 1. Adverse reactions within 30 days after whole vaccination procedure for 3~5, 6~12 and 13~17 year-old group in phase 1/2 (related to Figure 2~4).....                                    | 1  |
| Appendix 2. Adverse reactions within 7 days after each vaccination dose and total adverse reactions within 30 days after the first vaccination dose for 3~5 year-old group in phase 1/2            | 2  |
| Appendix 3. Adverse reactions within 7 days after each vaccination dose and overall adverse reactions within 30 days after the second vaccination dose for 3~5 year-old group in phase 1/2.....    | 3  |
| Appendix 4. Adverse reactions within 7 days after each vaccination dose and overall adverse reactions within 30 days after the third vaccination dose for 3~5 year-old group in phase 1/2          | 4  |
| Appendix 5. Adverse reactions within 7 days after each vaccination dose and overall adverse reactions within 30 days after the first vaccination dose for 6~12 year-old group in phase 1/2 .....   | 5  |
| Appendix 6. Adverse reactions within 7 days after each vaccination dose and overall adverse reactions within 30 days after the second vaccination dose for 6~12 year-old group in phase 1/2.....   | 6  |
| Appendix 7. Adverse reactions within 7 days after each vaccination dose and overall adverse reactions within 30 days after the third vaccination dose for 6~12 year-old group in phase 1/2 .....   | 7  |
| Appendix 8. Adverse reactions within 7 days after each vaccination dose and overall adverse reactions within 30 days after the first vaccination dose for 13~17 year-old group in phase 1/2 .....  | 8  |
| Appendix 9. Adverse reactions within 7 days after each vaccination dose and overall adverse reactions within 30 days after the second vaccination dose for 13~17 year-old group in phase 1/2.....  | 9  |
| Appendix 10. Adverse reactions within 7 days after each vaccination dose and overall adverse reactions within 30 days after the third vaccination dose for 13~17 year-old group in phase 1/2 ..... | 10 |
| Appendix 11. Abnormal changes of laboratory tests within 4 days after each vaccination in phase 1 in 3~5 year-old cohort.....                                                                      | 11 |
| Appendix 12. Abnormal changes of laboratory tests within 4 days after each vaccination in phase 1 in 6~12 year-old cohort.....                                                                     | 12 |
| Appendix 13. Abnormal changes of laboratory tests within 4 days after each vaccination in phase 1 in 13~17 year-old cohort.....                                                                    | 13 |
| Appendix 14: Statistical Analysis of neutralizing antibody GMT in phase1/2 3~5 year-old group on day 0.....                                                                                        | 14 |
| Appendix 15: Statistical Analysis of neutralizing antibody GMT in phase1/2 3~5 year-old group on day 28.....                                                                                       | 15 |

|                                                                                                                |    |
|----------------------------------------------------------------------------------------------------------------|----|
| Appendix 16: Statistical Analysis of neutralizing antibody GMT in phase1/2 3~5 year-old group on day 56.....   | 16 |
| Appendix 17: Statistical Analysis of neutralizing antibody GMT in phase1/2 3~5 year-old group on day 84.....   | 17 |
| Appendix 18: Statistical Analysis of neutralizing antibody GMT in phase1/2 6~12 year-old group on day 0.....   | 18 |
| Appendix 19: Statistical Analysis of neutralizing antibody GMT in phase1/2 6~12 year-old group on day 28.....  | 19 |
| Appendix 20: Statistical Analysis of neutralizing antibody GMT in phase1/2 6~12 year-old group on day 56.....  | 20 |
| Appendix 21: Statistical Analysis of neutralizing antibody GMT in phase1/2 6~12 year-old group on day 84.....  | 21 |
| Appendix 22: Statistical Analysis of neutralizing antibody GMT in phase1/2 13~17 year-old group on day 0.....  | 22 |
| Appendix 23: Statistical Analysis of neutralizing antibody GMT in phase1/2 13~17 year-old group on day 28..... | 23 |
| Appendix 24: Statistical Analysis of neutralizing antibody GMT in phase1/2 13~17 year-old group on day 56..... | 24 |
| Appendix 25: Statistical Analysis of neutralizing antibody GMT in phase1/2 13~17 year-old group on day 84..... | 25 |

**Appendix 1. Adverse reactions within 30 days after whole vaccination procedure for 3~5, 6~12 and 13~17 year-old group in phase 1/2 (related to Figure 2~4).**

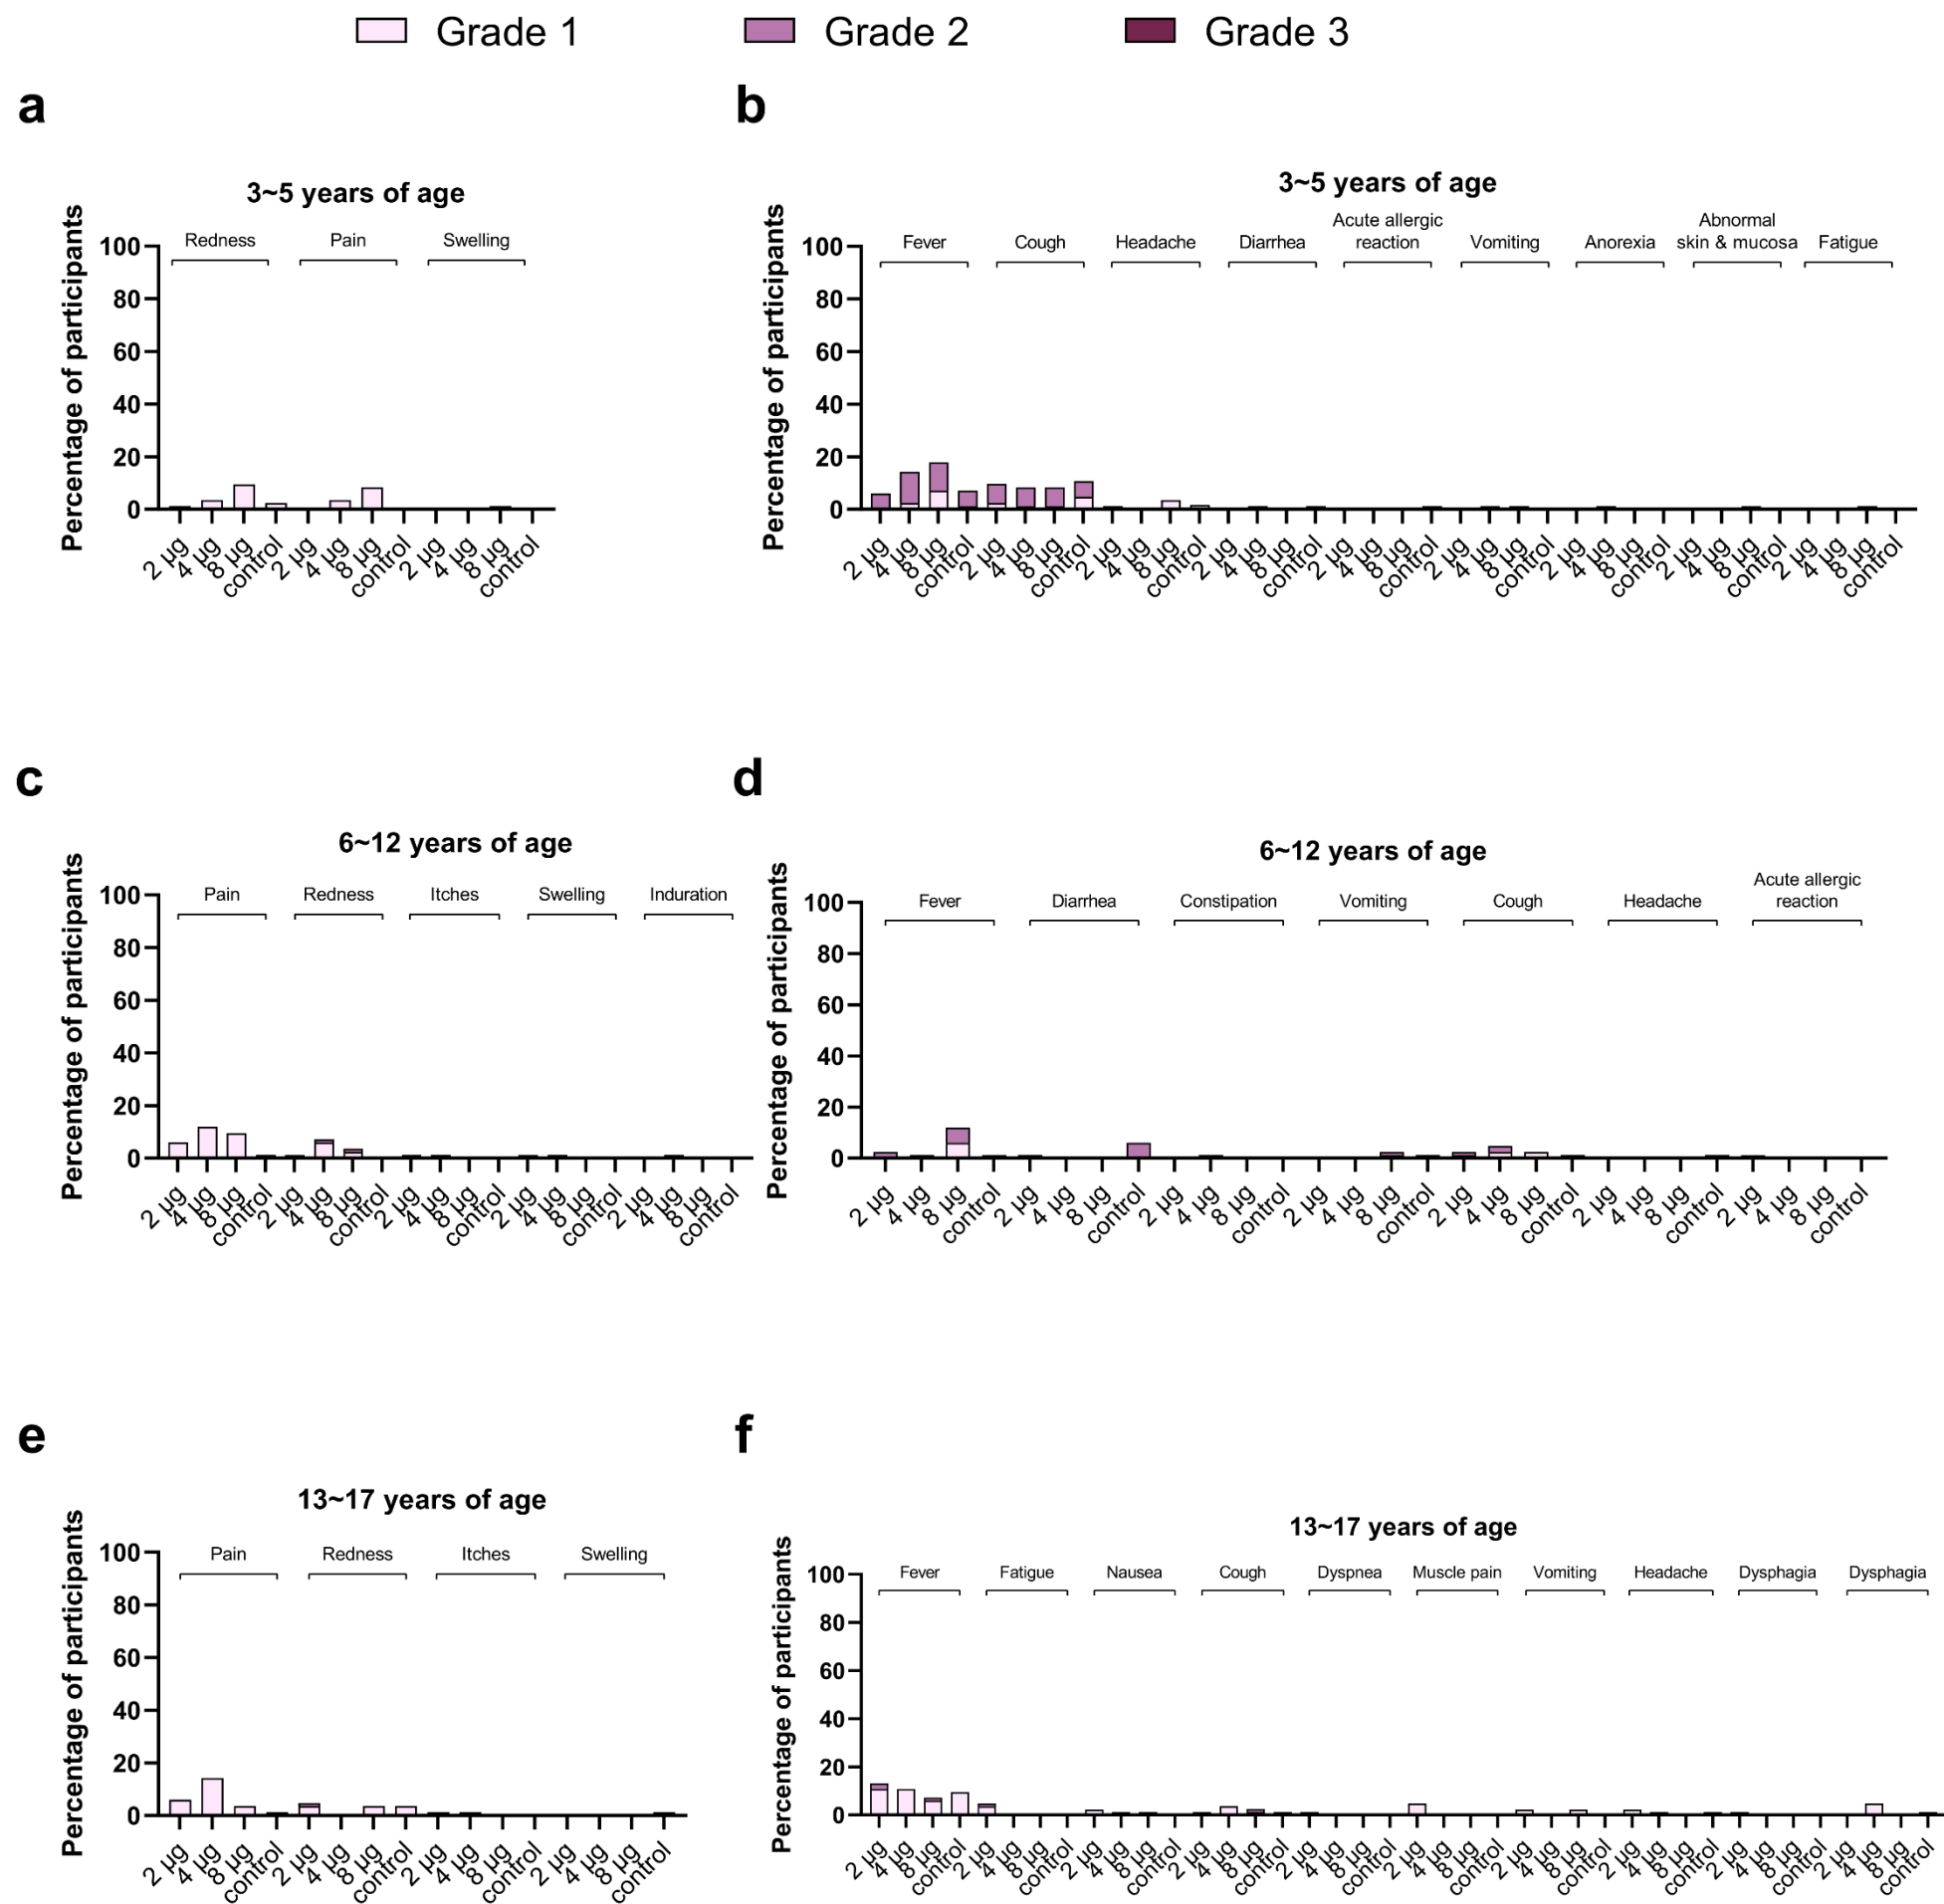

**Appendix 2. Adverse reactions within 7 days after each vaccination dose and total adverse reactions within 30 days after the first vaccination dose for 3~5 year-old group in phase 1/2**

|                                                              | 2 µg cohort (n=111) |                |         | 4 µg cohort (n=112) |                |         | 8 µg cohort (n=112) |                |         | Total (n=335)       |                |         |
|--------------------------------------------------------------|---------------------|----------------|---------|---------------------|----------------|---------|---------------------|----------------|---------|---------------------|----------------|---------|
|                                                              | Vaccination (n=83)  | control (n=28) | P value | Vaccination (n=84)  | control (n=28) | P value | Vaccination (n=84)  | control (n=28) | P value | Vaccination (n=251) | control (n=84) | P value |
| <b>Injection site adverse reactions after the first dose</b> |                     |                |         |                     |                |         |                     |                |         |                     |                |         |
| Any                                                          | 0(0.00%)            | 0(0.00%)       | 1       | 3(3.57%)            | 0(0.00%)       | 0.31    | 4(4.76%)            | 0(0.00%)       | 0.24    | 7(2.79%)            | 0(0.00%)       | 0.12    |
| Grade 1                                                      | 0(0.00%)            | 0(0.00%)       | --      | 3(3.57%)            | 0(0.00%)       | --      | 4(4.76%)            | 0(0.00%)       | --      | 7(2.79%)            | 0(0.00%)       | --      |
| Grade 2                                                      | 0(0.00%)            | 0(0.00%)       | --      | 0(0.00%)            | 0(0.00%)       | --      | 0(0.00%)            | 0(0.00%)       | --      | 0(0.00%)            | 0(0.00%)       | --      |
| Pain                                                         | 0(0.00%)            | 0(0.00%)       | 1       | 3(3.57%)            | 0(0.00%)       | 0.31    | 3(3.57%)            | 0(0.00%)       | 0.31    | 6(2.39%)            | 0(0.00%)       | 0.15    |
| Grade 1                                                      | 0(0.00%)            | 0(0.00%)       | --      | 3(3.57%)            | 0(0.00%)       | --      | 3(3.57%)            | 0(0.00%)       | --      | 6(2.39%)            | 0(0.00%)       | --      |
| Grade 2                                                      | 0(0.00%)            | 0(0.00%)       | --      | 0(0.00%)            | 0(0.00%)       | --      | 0(0.00%)            | 0(0.00%)       | --      | 0(0.00%)            | 0(0.00%)       | --      |
| Redness                                                      | 0(0.00%)            | 0(0.00%)       | 1       | 0(0.00%)            | 0(0.00%)       | 1       | 1(1.19%)            | 0(0.00%)       | 0.56    | 1(0.40%)            | 0(0.00%)       | 0.56    |
| Grade 1                                                      | 0(0.00%)            | 0(0.00%)       | --      | 0(0.00%)            | 0(0.00%)       | --      | 1(1.19%)            | 0(0.00%)       | --      | 1(0.40%)            | 0(0.00%)       | --      |
| Grade 2                                                      | 0(0.00%)            | 0(0.00%)       | --      | 0(0.00%)            | 0(0.00%)       | --      | 0(0.00%)            | 0(0.00%)       | --      | 0(0.00%)            | 0(0.00%)       | --      |
| Swelling                                                     | 0(0.00%)            | 0(0.00%)       | 1       | 0(0.00%)            | 0(0.00%)       | 1       | 0(0.00%)            | 0(0.00%)       | 1       | 0(0.00%)            | 0(0.00%)       | 1       |
| Grade 1                                                      | 0(0.00%)            | 0(0.00%)       | --      | 0(0.00%)            | 0(0.00%)       | --      | 0(0.00%)            | 0(0.00%)       | --      | 0(0.00%)            | 0(0.00%)       | --      |
| Grade 2                                                      | 0(0.00%)            | 0(0.00%)       | --      | 0(0.00%)            | 0(0.00%)       | --      | 0(0.00%)            | 0(0.00%)       | --      | 0(0.00%)            | 0(0.00%)       | --      |
| <b>Systemic adverse reactions after the first dose</b>       |                     |                |         |                     |                |         |                     |                |         |                     |                |         |
| Any                                                          | 10(12.05%)          | 0(0.00%)       | 0.054   | 14(16.67%)          | 8(28.57%)      | 0.17    | 16(19.05%)          | 4(14.29%)      | 0.57    | 40(15.94%)          | 12(14.29%)     | 0.72    |
| Grade 1                                                      | 3(3.61%)            | 0(0.00%)       | --      | 5(5.95%)            | 2(7.14%)       | --      | 7(8.33%)            | 3(1.71%)       | --      | 15(5.98%)           | 5(5.95%)       | --      |
| Grade 2                                                      | 7(8.43%)            | 0(0.00%)       | --      | 9(1.71%)            | 6(21.43%)      | --      | 9(10.71%)           | 1(3.57%)       | --      | 25(9.96%)           | 7(8.33%)       | --      |
| Fever                                                        | 4(4.82%)            | 0(0.00%)       | 0.24    | 7(8.33%)            | 2(7.14%)       | 0.84    | 11(13.10%)          | 1(3.57%)       | 0.16    | 22(8.76%)           | 3(3.57%)       | 0.17    |
| Grade 1                                                      | 0(0.00%)            | 0(0.00%)       | --      | 2(2.38%)            | 0(0.00%)       | --      | 4(4.76%)            | 0(0.00%)       | --      | 6(2.39%)            | 0(0.00%)       | --      |
| Grade 2                                                      | 4(4.82%)            | 0(0.00%)       | --      | 5(5.95%)            | 2(7.14%)       | --      | 7(8.33%)            | 1(3.57%)       | --      | 16(6.37%)           | 3(3.57%)       | --      |
| Fatigue                                                      | 0(0.00%)            | 0(0.00%)       | 1       | 0(0.00%)            | 0(0.00%)       | 1       | 1(1.19%)            | 0(0.00%)       | 0.56    | 1(0.40%)            | 0(0.00%)       | 0.56    |
| Grade 1                                                      | 0(0.00%)            | 0(0.00%)       | --      | 0(0.00%)            | 0(0.00%)       | --      | 1(1.19%)            | 0(0.00%)       | --      | 1(0.40%)            | 0(0.00%)       | --      |
| Grade 2                                                      | 0(0.00%)            | 0(0.00%)       | --      | 0(0.00%)            | 0(0.00%)       | --      | 0(0.00%)            | 0(0.00%)       | --      | 0(0.00%)            | 0(0.00%)       | --      |
| Cough                                                        | 5(6.02%)            | 0(0.00%)       | 0.18    | 5(5.95%)            | 4(14.29%)      | 0.16    | 2(2.38%)            | 3(1.71%)       | 0.064   | 12(4.78%)           | 7(8.33%)       | 0.22    |
| Grade 1                                                      | 2(2.41%)            | 0(0.00%)       | --      | 1(1.19%)            | 1(3.57%)       | --      | 0(0.00%)            | 3(1.71%)       | --      | 3(1.19%)            | 4(4.76%)       | --      |
| Grade 2                                                      | 3(3.61%)            | 0(0.00%)       | --      | 4(4.76%)            | 3(1.71%)       | --      | 2(2.38%)            | 0(0.00%)       | --      | 9(3.59%)            | 3(3.57%)       | --      |
| Headache                                                     | 1(1.20%)            | 0(0.00%)       | 0.56    | 0(0.00%)            | 0(0.00%)       | 1       | 2(2.38%)            | 0(0.00%)       | 0.41    | 3(1.19%)            | 0(0.00%)       | 0.31    |
| Grade 1                                                      | 1(1.20%)            | 0(0.00%)       | --      | 0(0.00%)            | 0(0.00%)       | --      | 2(2.38%)            | 0(0.00%)       | --      | 3(1.19%)            | 0(0.00%)       | --      |
| Grade 2                                                      | 0(0.00%)            | 0(0.00%)       | --      | 0(0.00%)            | 0(0.00%)       | --      | 0(0.00%)            | 0(0.00%)       | --      | 0(0.00%)            | 0(0.00%)       | --      |
| Diarrhea                                                     | 0(0.00%)            | 0(0.00%)       | 1       | 1(1.19%)            | 1(3.57%)       | 0.41    | 0(0.00%)            | 0(0.00%)       | 1       | 1(0.40%)            | 1(1.19%)       | 0.41    |
| Grade 1                                                      | 0(0.00%)            | 0(0.00%)       | --      | 1(1.19%)            | 1(3.57%)       | --      | 0(0.00%)            | 0(0.00%)       | --      | 1(0.40%)            | 1(1.19%)       | --      |
| Grade 2                                                      | 0(0.00%)            | 0(0.00%)       | --      | 0(0.00%)            | 0(0.00%)       | --      | 0(0.00%)            | 0(0.00%)       | --      | 0(0.00%)            | 0(0.00%)       | --      |
| Acute allergic reaction                                      | 0(0.00%)            | 0(0.00%)       | 1       | 0(0.00%)            | 1(3.57%)       | 0.082   | 0(0.00%)            | 0(0.00%)       | 1       | 0(0.00%)            | 1(1.19%)       | 0.083   |
| Grade 1                                                      | 0(0.00%)            | 0(0.00%)       | --      | 0(0.00%)            | 0(0.00%)       | --      | 0(0.00%)            | 0(0.00%)       | --      | 0(0.00%)            | 0(0.00%)       | --      |
| Grade 2                                                      | 0(0.00%)            | 0(0.00%)       | --      | 0(0.00%)            | 1(3.57%)       | --      | 0(0.00%)            | 0(0.00%)       | --      | 0(0.00%)            | 1(1.19%)       | --      |
| Vomiting                                                     | 0(0.00%)            | 0(0.00%)       | 1       | 1(1.19%)            | 0(0.00%)       | 0.56    | 0(0.00%)            | 0(0.00%)       | 1       | 1(0.40%)            | 0(0.00%)       | 0.56    |
| Grade 1                                                      | 0(0.00%)            | 0(0.00%)       | --      | 1(1.19%)            | 0(0.00%)       | --      | 0(0.00%)            | 0(0.00%)       | --      | 1(0.40%)            | 0(0.00%)       | --      |
| Grade 2                                                      | 0(0.00%)            | 0(0.00%)       | --      | 0(0.00%)            | 0(0.00%)       | --      | 0(0.00%)            | 0(0.00%)       | --      | 0(0.00%)            | 0(0.00%)       | --      |
| <b>Overall adverse reactions after the first dose</b>        |                     |                |         |                     |                |         |                     |                |         |                     |                |         |
| Any                                                          | 10(12.05%)          | 0(0.00%)       | 0.056   | 18(21.43%)          | 8(28.57%)      | 0.44    | 20(23.81%)          | 4(14.29%)      | 0.29    | 48(19.12%)          | 12(14.29%)     | 0.32    |
| Grade 1                                                      | 3(3.61%)            | 0(0.00%)       | --      | 9(10.71%)           | 2(7.14%)       | --      | 11(13.10%)          | 3(1.71%)       | --      | 23(9.16%)           | 5(5.95%)       | --      |
| Grade 2                                                      | 7(8.43%)            | 0(0.00%)       | --      | 9(10.71%)           | 6(21.43%)      | --      | 9(10.71%)           | 1(3.57%)       | --      | 25(9.96%)           | 7(8.33%)       | --      |

Data are n (%). Any refers to all the participants with any grade adverse reactions or reactions. Adverse reactions and reactions were graded according to the scale issued by the China State Food and Drug Administration. Grade 1=mild; Grade 2=moderate; Grade 3=severe.

**Appendix 3. Adverse reactions within 7 days after each vaccination dose and overall adverse reactions within 30 days after the second vaccination dose for 3~5 year-old group in phase 1/2**

|                                                               | 2 µg cohort (n=110) |                |         | 4 µg cohort (n=110) |                |         | 8 µg cohort (n=111) |                |         | Total (n=331)       |                |         |
|---------------------------------------------------------------|---------------------|----------------|---------|---------------------|----------------|---------|---------------------|----------------|---------|---------------------|----------------|---------|
|                                                               | vaccination (n=83)  | control (n=27) | P value | vaccination (n=83)  | control (n=27) | P value | vaccination (n=83)  | control (n=28) | P value | vaccination (n=249) | control (n=82) | P value |
| <b>Injection site adverse reactions after the second dose</b> |                     |                |         |                     |                |         |                     |                |         |                     |                |         |
| Any                                                           | 1(1.20%)            | 1(3.70%)       | 0.40    | 1(1.20%)            | 0(0.00%)       | 0.56    | 2(2.41%)            | 1(3.70%)       | 0.73    | 4(1.61%)            | 2(2.44%)       | 0.62    |
| Grade 1                                                       | 1(1.20%)            | 1(3.70%)       | --      | 1(1.20%)            | 0(0.00%)       | --      | 2(2.41%)            | 1(3.70%)       | --      | 4(1.61%)            | 2(2.44%)       | --      |
| Grade 2                                                       | 0(0.00%)            | 0(0.00%)       | --      | 0(0.00%)            | 0(0.00%)       | --      | 0(0.00%)            | 0(0.00%)       | --      | 0(0.00%)            | 0(0.00%)       | --      |
| Pain                                                          | 0(0.00%)            | 0(0.00%)       | 1       | 0(0.00%)            | 0(0.00%)       | 1       | 2(2.41%)            | 0(0.00%)       | 0.41    | 2(0.80%)            | 0(0.00%)       | 0.42    |
| Grade 1                                                       | 0(0.00%)            | 0(0.00%)       | --      | 0(0.00%)            | 0(0.00%)       | --      | 2(2.41%)            | 0(0.00%)       | --      | 2(0.80%)            | 0(0.00%)       | --      |
| Grade 2                                                       | 0(0.00%)            | 0(0.00%)       | --      | 0(0.00%)            | 0(0.00%)       | --      | 0(0.00%)            | 0(0.00%)       | --      | 0(0.00%)            | 0(0.00%)       | --      |
| Redness                                                       | 1(1.20%)            | 1(3.70%)       | 0.40    | 1(1.20%)            | 0(0.00%)       | 0.57    | 0(0.00%)            | 1(3.70%)       | 0.084   | 2(0.80%)            | 2(2.44%)       | 0.24    |
| Grade 1                                                       | 1(1.20%)            | 1(3.70%)       | --      | 1(1.20%)            | 0(0.00%)       | --      | 0(0.00%)            | 1(3.70%)       | --      | 2(0.80%)            | 2(2.44%)       | --      |
| Grade 2                                                       | 0(0.00%)            | 0(0.00%)       | --      | 0(0.00%)            | 0(0.00%)       | --      | 0(0.00%)            | 0(0.00%)       | --      | 0(0.00%)            | 0(0.00%)       | --      |
| <b>Systemic adverse reactions after the second dose</b>       |                     |                |         |                     |                |         |                     |                |         |                     |                |         |
| Any                                                           | 1(1.20%)            | 1(3.70%)       | 0.40    | 6(7.23%)            | 2(7.41%)       | 0.98    | 4(4.82%)            | 0(0.00%)       | 0.24    | 11(4.42%)           | 3(3.66%)       | 0.77    |
| Grade 1                                                       | 0(0.00%)            | 0(0.00%)       | --      | 0(0.00%)            | 0(0.00%)       | --      | 1(1.20%)            | 0(0.00%)       | --      | 1(0.40%)            | 0(0.00%)       | --      |
| Grade 2                                                       | 1(1.20%)            | 1(3.70%)       | --      | 6(7.23%)            | 2(7.41%)       | --      | 3(3.61%)            | 0(0.00%)       | --      | 10(4.02%)           | 3(3.66%)       | --      |
| Fever                                                         | 0(0.00%)            | 1(3.70%)       | 0.078   | 6(7.23%)            | 0(0.00%)       | 0.15    | 2(2.41%)            | 0(0.00%)       | 0.41    | 8(3.21%)            | 1(1.22%)       | 0.34    |
| Grade 1                                                       | 0(0.00%)            | 0(0.00%)       | --      | 0(0.00%)            | 0(0.00%)       | --      | 1(1.20%)            | 0(0.00%)       | --      | 1(0.40%)            | 0(0.00%)       | --      |
| Grade 2                                                       | 0(0.00%)            | 1(3.70%)       | --      | 6(7.23%)            | 0(0.00%)       | --      | 1(1.20%)            | 0(0.00%)       | --      | 7(2.81%)            | 1(1.22%)       | --      |
| Fatigue                                                       | 0(0.00%)            | 0(0.00%)       | 1       | 0(0.00%)            | 0(0.00%)       | 1       | 0(0.00%)            | 0(0.00%)       | 1       | 0(0.00%)            | 0(0.00%)       | 1       |
| Grade 1                                                       | 0(0.00%)            | 0(0.00%)       | --      | 0(0.00%)            | 0(0.00%)       | --      | 0(0.00%)            | 0(0.00%)       | --      | 0(0.00%)            | 0(0.00%)       | --      |
| Grade 2                                                       | 0(0.00%)            | 0(0.00%)       | --      | 0(0.00%)            | 0(0.00%)       | --      | 0(0.00%)            | 0(0.00%)       | --      | 0(0.00%)            | 0(0.00%)       | --      |
| Cough                                                         | 1(1.20%)            | 0(0.00%)       | 0.57    | 0(0.00%)            | 0(0.00%)       | 1       | 2(2.41%)            | 0(0.00%)       | 0.41    | 3(1.20%)            | 0(0.00%)       | 0.32    |
| Grade 1                                                       | 0(0.00%)            | 0(0.00%)       | --      | 0(0.00%)            | 0(0.00%)       | --      | 0(0.00%)            | 0(0.00%)       | --      | 0(0.00%)            | 0(0.00%)       | --      |
| Grade 2                                                       | 1(1.20%)            | 0(0.00%)       | --      | 0(0.00%)            | 0(0.00%)       | --      | 2(2.41%)            | 0(0.00%)       | --      | 3(1.20%)            | 0(0.00%)       | --      |
| <b>Overall adverse reactions after the second dose</b>        |                     |                |         |                     |                |         |                     |                |         |                     |                |         |
| Any                                                           | 2(2.41%)            | 2(7.41%)       | 0.23    | 7(8.43%)            | 2(7.41%)       | 1       | 6(7.23%)            | 2(7.41%)       | 0.98    | 15(6.02%)           | 6(7.32%)       | 0.68    |
| Grade 1                                                       | 1(1.20%)            | 1(3.70%)       | --      | 6(7.23%)            | 0(0.00%)       | --      | 3(3.61%)            | 1(3.70%)       | --      | 10(4.02%)           | 2(2.44%)       | --      |
| Grade 2                                                       | 1(1.20%)            | 1(3.70%)       | --      | 1(1.20%)            | 2(7.41%)       | --      | 3(3.61%)            | 1(3.70%)       | --      | 5(2.01%)            | 4(4.88%)       | --      |

Data are n (%). Any refers to all the participants with any grade adverse reactions or reactions. Adverse reactions and reactions were graded according to the scale issued by the China State Food and Drug Administration. Grade 1=mild; Grade 2=moderate; Grade 3=severe.

**Appendix 4. Adverse reactions within 7 days after each vaccination dose and overall adverse reactions within 30 days after the third vaccination dose for 3~5 year-old group in phase 1/2**

|                                                              | 2 µg cohort (n=109) |                |         | 4 µg cohort (n=109) |                |         | 8 µg cohort (n=111) |                |         | Total (n=329)       |                |         |
|--------------------------------------------------------------|---------------------|----------------|---------|---------------------|----------------|---------|---------------------|----------------|---------|---------------------|----------------|---------|
|                                                              | Vaccination (n=82)  | control (n=27) | P value | Vaccination (n=83)  | control (n=26) | P value | Vaccination (n=83)  | control (n=28) | P value | Vaccination (n=248) | control (n=81) | P value |
| <b>Injection site adverse reactions after the third dose</b> |                     |                |         |                     |                |         |                     |                |         |                     |                |         |
| Any                                                          | 0(0.00%)            | 0(0.00%)       | 1       | 0(0.00%)            | 0(0.00%)       | 1       | 2(2.41%)            | 0(0.00%)       | 0.41    | 2(0.81%)            | 0(0.00%)       | 0.42    |
| Grade 1                                                      | 0(0.00%)            | 0(0.00%)       | --      | 0(0.00%)            | 0(0.00%)       | --      | 2(2.41%)            | 0(0.00%)       | --      | 2(0.81%)            | 0(0.00%)       | --      |
| Grade 2                                                      | 0(0.00%)            | 0(0.00%)       | --      | 0(0.00%)            | 0(0.00%)       | --      | 0(0.00%)            | 0(0.00%)       | --      | 0(0.00%)            | 0(0.00%)       | --      |
| Pain                                                         | 0(0.00%)            | 0(0.00%)       | 1       | 0(0.00%)            | 0(0.00%)       | 1       | 2(2.41%)            | 0(0.00%)       | 0.41    | 2(0.81%)            | 0(0.00%)       | 0.42    |
| Grade 1                                                      | 0(0.00%)            | 0(0.00%)       | --      | 0(0.00%)            | 0(0.00%)       | --      | 2(2.41%)            | 0(0.00%)       | --      | 2(0.81%)            | 0(0.00%)       | --      |
| Grade 2                                                      | 0(0.00%)            | 0(0.00%)       | --      | 0(0.00%)            | 0(0.00%)       | --      | 0(0.00%)            | 0(0.00%)       | --      | 0(0.00%)            | 0(0.00%)       | --      |
| <b>Systemic adverse reactions after the third dose</b>       |                     |                |         |                     |                |         |                     |                |         |                     |                |         |
| Any                                                          | 3(3.66%)            | 0(0.00%)       | 0.31    | 2(2.41%)            | 0(0.00%)       | 0.42    | 8(9.64%)            | 2(7.14%)       | 1       | 13(5.24%)           | 2(2.47%)       | 0.30    |
| Grade 1                                                      | 0(0.00%)            | 0(0.00%)       | --      | 1(1.20%)            | 0(0.00%)       | --      | 4(4.82%)            | 1(3.57%)       | --      | 5(2.02%)            | 1(1.23%)       | --      |
| Grade 2                                                      | 3(3.66%)            | 0(0.00%)       | --      | 1(1.20%)            | 0(0.00%)       | --      | 4(4.82%)            | 1(3.57%)       | --      | 8(3.23%)            | 1(1.23%)       | --      |
| Fever                                                        | 1(1.22%)            | 0(0.00%)       | 0.56    | 1(1.20%)            | 0(0.00%)       | 0.57    | 2(2.41%)            | 1(3.57%)       | 1       | 4(1.61%)            | 1(1.23%)       | 0.81    |
| Grade 1                                                      | 0(0.00%)            | 0(0.00%)       | --      | 0(0.00%)            | 0(0.00%)       | --      | 1(1.20%)            | 1(3.57%)       | --      | 1(0.40%)            | 1(1.23%)       | --      |
| Grade 2                                                      | 1(1.22%)            | 0(0.00%)       | --      | 1(1.20%)            | 0(0.00%)       | --      | 1(1.20%)            | 0(0.00%)       | --      | 3(1.21%)            | 0(0.00%)       | --      |
| Fatigue                                                      | 0(0.00%)            | 0(0.00%)       | 1       | 0(0.00%)            | 0(0.00%)       | 1       | 0(0.00%)            | 0(0.00%)       | 1       | 0(0.00%)            | 0(0.00%)       | 1       |
| Grade 1                                                      | 0(0.00%)            | 0(0.00%)       | --      | 0(0.00%)            | 0(0.00%)       | --      | 0(0.00%)            | 0(0.00%)       | --      | 0(0.00%)            | 0(0.00%)       | --      |
| Grade 2                                                      | 0(0.00%)            | 0(0.00%)       | --      | 0(0.00%)            | 0(0.00%)       | --      | 0(0.00%)            | 0(0.00%)       | --      | 0(0.00%)            | 0(0.00%)       | --      |
| Cough                                                        | 2(2.44%)            | 0(0.00%)       | 0.41    | 0(0.00%)            | 0(0.00%)       | 1       | 3 (3.61%)           | 1(3.57%)       | 1       | 5(1.98%)            | 1(1.23%)       | 0.65    |
| Grade 1                                                      | 0(0.00%)            | 0(0.00%)       | --      | 0(0.00%)            | 0(0.00%)       | --      | 1(1.20%)            | 0(0.00%)       | --      | 1(0.40%)            | 0(0.00%)       | --      |
| Grade 2                                                      | 2(2.44%)            | 0(0.00%)       | --      | 0(0.00%)            | 0(0.00%)       | --      | 2(2.41%)            | 1(3.57%)       | --      | 4(1.61%)            | 1(1.23%)       | --      |
| Anorexia                                                     | 0(0.00%)            | 0(0.00%)       | 1       | 1(1.20%)            | 0(0.00%)       | 0.57    | 0(0.00%)            | 0(0.00%)       | 1       | 1(0.40%)            | 0(0.00%)       | 0.57    |
| Grade 1                                                      | 0(0.00%)            | 0(0.00%)       | --      | 1(1.20%)            | 0(0.00%)       | --      | 0(0.00%)            | 0(0.00%)       | --      | 1(0.40%)            | 0(0.00%)       | --      |
| Grade 2                                                      | 0(0.00%)            | 0(0.00%)       | --      | 0(0.00%)            | 0(0.00%)       | --      | 0(0.00%)            | 0(0.00%)       | --      | 0(0.00%)            | 0(0.00%)       | --      |
| Vomiting                                                     | 0(0.00%)            | 0(0.00%)       | 1       | 0(0.00%)            | 0(0.00%)       | 1       | 1(1.20%)            | 0(0.00%)       | 0.56    | 1(0.40%)            | 0(0.00%)       | 0.57    |
| Grade 1                                                      | 0(0.00%)            | 0(0.00%)       | --      | 0(0.00%)            | 0(0.00%)       | --      | 1(1.20%)            | 0(0.00%)       | --      | 1(0.40%)            | 0(0.00%)       | --      |
| Grade 2                                                      | 0(0.00%)            | 0(0.00%)       | --      | 0(0.00%)            | 0(0.00%)       | --      | 0(0.00%)            | 0(0.00%)       | --      | 0(0.00%)            | 0(0.00%)       | --      |
| Abnormal skin and mucosa                                     | 0(0.00%)            | 0(0.00%)       | 1       | 0(0.00%)            | 0(0.00%)       | 1       | 1(1.20%)            | 0(0.00%)       | 0.56    | 1(0.40%)            | 0(0.00%)       | 0.57    |
| Grade 1                                                      | 0(0.00%)            | 0(0.00%)       | --      | 0(0.00%)            | 0(0.00%)       | --      | 0(0.00%)            | 0(0.00%)       | --      | 0(0.00%)            | 0(0.00%)       | --      |
| Grade 2                                                      | 0(0.00%)            | 0(0.00%)       | --      | 0(0.00%)            | 0(0.00%)       | --      | 1(1.20%)            | 0(0.00%)       | --      | 1(0.40%)            | 0(0.00%)       | --      |
| Headache                                                     | 0(0.00%)            | 0(0.00%)       | 1       | 0(0.00%)            | 0(0.00%)       | 1       | 1(1.20%)            | 0(0.00%)       | 0.56    | 1(0.40%)            | 0(0.00%)       | 0.57    |
| Grade 1                                                      | 0(0.00%)            | 0(0.00%)       | --      | 0(0.00%)            | 0(0.00%)       | --      | 1(1.20%)            | 0(0.00%)       | --      | 1(0.40%)            | 0(0.00%)       | --      |
| Grade 2                                                      | 0(0.00%)            | 0(0.00%)       | --      | 0(0.00%)            | 0(0.00%)       | --      | 0(0.00%)            | 0(0.00%)       | --      | 0(0.00%)            | 0(0.00%)       | --      |
| <b>Overall adverse reactions after the third dose</b>        |                     |                |         |                     |                |         |                     |                |         |                     |                |         |
| Any                                                          | 3(3.66%)            | 0(0.00%)       | 0.31    | 2(2.41%)            | 0(0.00%)       | 0.42    | 10(12.05%)          | 2(7.14%)       | 0.47    | 15(6.05%)           | 2(2.47%)       | 0.21    |
| Grade 1                                                      | 0(0.00%)            | 0(0.00%)       | --      | 1(1.20%)            | 0(0.00%)       | --      | 6(7.23%)            | 1(3.57%)       | --      | 7(2.82%)            | 1(1.23%)       | --      |
| Grade 2                                                      | 3(3.66%)            | 0(0.00%)       | --      | 1(1.20%)            | 0(0.00%)       | --      | 4(4.82%)            | 1(3.57%)       | --      | 8(3.23%)            | 1(1.23%)       | --      |

Data are n (%). Any refers to all the participants with any grade adverse reactions or reactions. Adverse reactions and reactions were graded according to the scale issued by the China

State Food and Drug Administration. Grade 1=mild; Grade 2=moderate; Grade 3=severe.

**Appendix 5. Adverse reactions within 7 days after each vaccination dose and overall adverse reactions within 30 days after the first vaccination dose for 6~12 year-old group in phase 1/2**

|                                                              | 2 µg cohort (n=112) |                |         | 4 µg cohort (n=112) |                |         | 8 µg cohort (n=112) |                |         | Total (n=336)       |                |         |
|--------------------------------------------------------------|---------------------|----------------|---------|---------------------|----------------|---------|---------------------|----------------|---------|---------------------|----------------|---------|
|                                                              | vaccination (n=84)  | control (n=28) | P value | Vaccination (n=84)  | control (n=28) | P value | vaccination (n=84)  | control (n=28) | P value | Vaccination (n=252) | control (n=84) | P value |
| <b>Injection site adverse reactions after the first dose</b> |                     |                |         |                     |                |         |                     |                |         |                     |                |         |
| Any                                                          | 2(2.38%)            | 0(0.00%)       | 0.41    | 8(9.52%)            | 0(0.00%)       | 0.090   | 4(4.76%)            | 0(0.00%)       | 0.24    | 14(5.56%)           | 0(0.00%)       | 0.027   |
| Grade 1                                                      | 2(2.38%)            | 0(0.00%)       | --      | 8(9.52%)            | 0(0.00%)       | --      | 4(4.76%)            | 0(0.00%)       | --      | 14(5.56%)           | 0(0.00%)       | --      |
| Pain                                                         | 2(2.38%)            | 0(0.00%)       | 0.41    | 5(5.95%)            | 0(0.00%)       | 0.19    | 4(4.76%)            | 0(0.00%)       | 0.24    | 11(4.37%)           | 0(0.00%)       | 0.052   |
| Grade 1                                                      | 2(2.38%)            | 0(0.00%)       | --      | 5(5.95%)            | 0(0.00%)       | --      | 4(4.76%)            | 0(0.00%)       | --      | 11(4.37%)           | 0(0.00%)       | --      |
| Redness                                                      | 0(0.00%)            | 0(0.00%)       | 1       | 2(2.38%)            | 0(0.00%)       | 0.41    | 0(0.00%)            | 0(0.00%)       | 1       | 2(0.79%)            | 0(0.00%)       | 0.41    |
| Grade 1                                                      | 0(0.00%)            | 0(0.00%)       | --      | 2(2.38%)            | 0(0.00%)       | --      | 0(0.00%)            | 0(0.00%)       | --      | 2(0.79%)            | 0(0.00%)       | --      |
| Induration                                                   | 0(0.00%)            | 0(0.00%)       | 1       | 1(1.19%)            | 0(0.00%)       | 0.56    | 0(0.00%)            | 0(0.00%)       | 1       | 1(0.40%)            | 0(0.00%)       | 0.56    |
| Grade 1                                                      | 0(0.00%)            | 0(0.00%)       | --      | 1(1.19%)            | 0(0.00%)       | --      | 0(0.00%)            | 0(0.00%)       | --      | 1(0.40%)            | 0(0.00%)       | --      |
| <b>Systemic adverse reactions after the first dose</b>       |                     |                |         |                     |                |         |                     |                |         |                     |                |         |
| Any                                                          | 3(3.57%)            | 1(3.57%)       | 1       | 3(3.57%)            | 0(0.00%)       | 0.31    | 10(11.90%)          | 0(0.00%)       | 0.056   | 16(6.35%)           | 1(1.19%)       | 0.062   |
| Grade 1                                                      | 2(2.38%)            | 1(3.57%)       | --      | 3(3.57%)            | 0(0.00%)       | --      | 6(7.14%)            | 0(0.00%)       | --      | 11(4.37%)           | 1(1.19%)       | --      |
| Grade 2                                                      | 1(1.19%)            | 0(0.00%)       | --      | 0(0.00%)            | 0(0.00%)       | --      | 4(4.76%)            | 0(0.00%)       | --      | 5(1.98%)            | 0(0.00%)       | --      |
| Fever                                                        | 1(1.19%)            | 0(0.00%)       | 0.56    | 1(1.19%)            | 0(0.00%)       | 0.56    | 6(7.14%)            | 0(0.00%)       | 0.15    | 8(3.17%)            | 0(0.00%)       | 0.098   |
| Grade 1                                                      | 0(0.00%)            | 0(0.00%)       | --      | 1(1.19%)            | 0(0.00%)       | --      | 3(3.57%)            | 0(0.00%)       | --      | 4(1.59%)            | 0(0.00%)       | --      |
| Grade 2                                                      | 1(1.19%)            | 0(0.00%)       | --      | 0(0.00%)            | 0(0.00%)       | --      | 3(3.57%)            | 0(0.00%)       | --      | 4(1.59%)            | 0(0.00%)       | --      |
| Diarrhea                                                     | 1(1.19%)            | 0(0.00%)       | 0.56    | 0(0.00%)            | 0(0.00%)       | 1       | 0(0.00%)            | 0(0.00%)       | 1       | 1(0.40%)            | 0(0.00%)       | 0.56    |
| Grade 1                                                      | 1(1.19%)            | 0(0.00%)       | --      | 0(0.00%)            | 0(0.00%)       | --      | 0(0.00%)            | 0(0.00%)       | --      | 1(0.40%)            | 0(0.00%)       | --      |
| Cough                                                        | 1(1.19%)            | 0(0.00%)       | 0.56    | 1(1.19%)            | 0(0.00%)       | 0.56    | 2(2.38%)            | 0(0.00%)       | 0.41    | 4(1.59%)            | 0(0.00%)       | 0.25    |
| Grade 1                                                      | 1(1.19%)            | 0(0.00%)       | --      | 1(1.19%)            | 0(0.00%)       | --      | 2(2.38%)            | 0(0.00%)       | --      | 4(1.59%)            | 0(0.00%)       | --      |
| Constipation                                                 | 0(0.00%)            | 0(0.00%)       | 1       | 1(1.19%)            | 0(0.00%)       | 0.56    | 0(0.00%)            | 0(0.00%)       | 1       | 1(0.40%)            | 0(0.00%)       | 0.56    |
| Grade 1                                                      | 0(0.00%)            | 0(0.00%)       | --      | 1(1.19%)            | 0(0.00%)       | --      | 0(0.00%)            | 0(0.00%)       | --      | 1(0.40%)            | 0(0.00%)       | --      |
| Vomiting                                                     | 0(0.00%)            | 1(3.57%)       | 0.082   | 0(0.00%)            | 0(0.00%)       | 1       | 2(2.38%)            | 0(0.00%)       | 0.41    | 2(0.79%)            | 1(1.19%)       | 0.74    |
| Grade 1                                                      | 0(0.00%)            | 1(3.57%)       | --      | 0(0.00%)            | 0(0.00%)       | --      | 1(1.19%)            | 0(0.00%)       | --      | 1(0.40%)            | 1(1.19%)       | --      |
| Grade 2                                                      | 0(0.00%)            | 0(0.00%)       | --      | 0(0.00%)            | 0(0.00%)       | --      | 1(1.19%)            | 0(0.00%)       | --      | 1(0.40%)            | 0(0.00%)       | --      |
| <b>Overall adverse reactions after the first dose</b>        |                     |                |         |                     |                |         |                     |                |         |                     |                |         |
| Any                                                          | 5(5.95%)            | 1(3.57%)       | 0.58    | 11(13.10%)          | 0(0.00%)       | 0.044   | 15(17.86%)          | 0(0.00%)       | 0.016   | 30(11.90%)          | 1(1.19%)       | 0.0033  |
| Grade 1                                                      | 4(4.76%)            | 1(3.57%)       | --      | 11(13.10%)          | 0(0.00%)       | --      | 11(13.10%)          | 0(0.00%)       | --      | 25(9.92%)           | 1(1.19%)       | --      |
| Grade 2                                                      | 1(1.19%)            | 0(0.00%)       | --      | 0(0.00%)            | 0(0.00%)       | --      | 4(4.76%)            | 0(0.00%)       | --      | 5(1.98%)            | 0(0.00%)       | --      |

Data are n (%). Any refers to all the participants with any grade adverse reactions or reactions. Adverse reactions and reactions were graded according to the scale issued by the China State Food and Drug Administration. Grade 1=mild; Grade 2=moderate; Grade 3=severe.



**Appendix 6. Adverse reactions within 7 days after each vaccination dose and overall adverse reactions within 30 days after the second vaccination dose for 6~12 year-old group in phase 1/2**

|                                                               | 2 µg cohort (n=112) |                |         | 4 µg cohort (n=112) |                |         | 8 µg cohort (n=111) |                |         | Total (n=335)       |                |         |
|---------------------------------------------------------------|---------------------|----------------|---------|---------------------|----------------|---------|---------------------|----------------|---------|---------------------|----------------|---------|
|                                                               | vaccination (n=84)  | control (n=28) | P value | vaccination (n=84)  | control (n=28) | P value | vaccination (n=83)  | control (n=28) | P value | vaccination (n=251) | control (n=84) | P value |
| <b>Injection site adverse reactions after the second dose</b> |                     |                |         |                     |                |         |                     |                |         |                     |                |         |
| Any                                                           | 2(2.38%)            | 0(0.00%)       | 0.41    | 7(8.33%)            | 0(0.00%)       | 0.11    | 6(7.23%)            | 0(0.00%)       | 0.14    | 15(6.00%)           | 0(0.00%)       | 0.022   |
| Grade 1                                                       | 2(2.38%)            | 0(0.00%)       |         | 7(8.33%)            | 0(0.00%)       |         | 5(6.02%)            | 0(0.00%)       |         | 14(5.58%)           | 0(0.00%)       |         |
| Grade 2                                                       | 0(0.00%)            | 0(0.00%)       |         | 0(0.00%)            | 0(0.00%)       |         | 1(1.20%)            | 0(0.00%)       |         | 1(0.40%)            | 0(0.00%)       |         |
| Pain                                                          | 2(2.38%)            | 0(0.00%)       | 0.41    | 4(4.76%)            | 0(0.00%)       | 0.24    | 4(4.82%)            | 0(0.00%)       | 0.24    | 10(3.98%)           | 0(0.00%)       | 0.063   |
| Grade 1                                                       | 2(2.38%)            | 0(0.00%)       |         | 4(4.76%)            | 0(0.00%)       |         | 4(4.82%)            | 0(0.00%)       |         | 10(3.98%)           | 0(0.00%)       |         |
| Redness                                                       | 0(0.00%)            | 0(0.00%)       | 1       | 1(1.19%)            | 0(0.00%)       | 0.56    | 2(2.41%)            | 0(0.00%)       | 0.41    | 3(1.20%)            | 0(0.00%)       | 0.31    |
| Grade 1                                                       | 0(0.00%)            | 0(0.00%)       |         | 1(1.19%)            | 0(0.00%)       |         | 1(1.20%)            | 0(0.00%)       |         | 2(0.80%)            | 0(0.00%)       |         |
| Grade 2                                                       | 0(0.00%)            | 0(0.00%)       |         | 0(0.00%)            | 0(0.00%)       |         | 1(1.20%)            | 0(0.00%)       |         | 1(0.40%)            | 0(0.00%)       |         |
| Itches                                                        | 0(0.00%)            | 0(0.00%)       | 1       | 1(1.19%)            | 0(0.00%)       | 0.56    | 0(0.00%)            | 0(0.00%)       | 1       | 1(0.40%)            | 0(0.00%)       | 0.56    |
| Grade 1                                                       | 0(0.00%)            | 0(0.00%)       |         | 1(1.19%)            | 0(0.00%)       |         | 0(0.00%)            | 0(0.00%)       |         | 1(0.40%)            | 0(0.00%)       |         |
| Swelling                                                      | 0(0.00%)            | 0(0.00%)       | 1       | 1(1.19%)            | 0(0.00%)       | 0.56    | 0(0.00%)            | 0(0.00%)       | 1       | 1(0.40%)            | 0(0.00%)       | 0.56    |
| Grade 1                                                       | 0(0.00%)            | 0(0.00%)       |         | 1(1.19%)            | 0(0.00%)       |         | 0(0.00%)            | 0(0.00%)       |         | 1(0.40%)            | 0(0.00%)       |         |
| <b>Systemic adverse reactions after the second dose</b>       |                     |                |         |                     |                |         |                     |                |         |                     |                |         |
| Any                                                           | 3(3.57%)            | 2(7.14%)       | 0.43    | 2(2.38%)            | 1(3.57%)       | 0.74    | 3(3.61%)            | 0(0.00%)       | 0.31    | 8(3.19%)            | 3(3.57%)       | 0.86    |
| Grade 1                                                       | 0(0.00%)            | 1(3.57%)       |         | 0(0.00%)            | 0(0.00%)       |         | 2(2.41%)            | 0(0.00%)       |         | 2(0.80%)            | 1(1.19%)       |         |
| Grade 2                                                       | 2(2.38%)            | 1(3.57%)       |         | 2(2.38%)            | 1(3.57%)       |         | 1(1.20%)            | 0(0.00%)       |         | 5(2.00%)            | 2(2.38%)       |         |
| Grade 3                                                       | 1(1.19%)            | 0(0.00%)       |         | 0(0.00%)            | 0(0.00%)       |         | 0(0.00%)            | 0(0.00%)       |         | 1(0.40%)            | 0(0.00%)       |         |
| Fever                                                         | 1(1.19%)            | 0(0.00%)       | 0.56    | 0(0.00%)            | 1(3.57%)       | 0.082   | 3(3.57%)            | 0(0.00%)       | 0.31    | 4(1.59%)            | 1(1.19%)       | 0.79    |
| Grade 1                                                       | 0(0.00%)            | 0(0.00%)       |         | 0(0.00%)            | 0(0.00%)       |         | 2(2.41%)            | 0(0.00%)       |         | 2(0.80%)            | 0(0.00%)       |         |
| Grade 2                                                       | 1(1.19%)            | 0(0.00%)       |         | 0(0.00%)            | 1(3.57%)       |         | 1(1.20%)            | 0(0.00%)       |         | 2(0.80%)            | 1(1.19%)       |         |
| Cough                                                         | 1(1.19%)            | 1(3.57%)       | 0.41    | 2(2.38%)            | 0(0.00%)       | 0.41    | 0(0.00%)            | 0(0.00%)       | 1       | 3(1.20%)            | 1(1.19%)       | 1       |
| Grade 1                                                       | 0(0.00%)            | 1(3.57%)       |         | 0(0.00%)            | 0(0.00%)       |         | 0(0.00%)            | 0(0.00%)       |         | 0(0.00%)            | 1(1.19%)       |         |
| Grade 2                                                       | 1(1.19%)            | 0(0.00%)       |         | 2(2.38%)            | 0(0.00%)       |         | 0(0.00%)            | 0(0.00%)       |         | 3(1.20%)            | 0(0.00%)       |         |
| Headache                                                      | 0(0.00%)            | 1(3.57%)       | 0.082   | 0(0.00%)            | 0(0.00%)       | 1       | 0(0.00%)            | 0(0.00%)       | 1       | 0(0.00%)            | 1(1.19%)       | 0.083   |
| Grade 2                                                       | 0(0.00%)            | 1(3.57%)       |         | 0(0.00%)            | 0(0.00%)       |         | 0(0.00%)            | 0(0.00%)       |         | 0(0.00%)            | 1(1.19%)       |         |
| Acute allergic reaction                                       | 1(1.19%)            | 0(0.00%)       | 0.56    | 0(0.00%)            | 0(0.00%)       | 1       | 0(0.00%)            | 0(0.00%)       | 1       | 1(0.40%)            | 0(0.00%)       | 1       |
| Grade 3                                                       | 1(1.19%)            | 0(0.00%)       |         | 0(0.00%)            | 0(0.00%)       |         | 0(0.00%)            | 0(0.00%)       |         | 1(0.40%)            | 0(0.00%)       |         |
| <b>Overall adverse reactions after the second dose</b>        |                     |                |         |                     |                |         |                     |                |         |                     |                |         |
| Any                                                           | 5(5.95%)            | 2(7.14%)       | 0.82    | 9(10.71%)           | 1(3.57%)       | 0.25    | 9(10.84%)           | 0(0.00%)       | 0.069   | 23(9.16%)           | 3(3.57%)       | 0.097   |
| Grade 1                                                       | 2(2.38%)            | 1(3.57%)       |         | 7(8.33%)            | 0(0.00%)       |         | 7(8.43%)            | 0(0.00%)       |         | 16(6.37%)           | 1(1.19%)       |         |
| Grade 2                                                       | 2(2.38%)            | 1(3.57%)       |         | 2(2.38%)            | 1(3.57%)       |         | 2(2.41%)            | 0(0.00%)       |         | 6(2.40%)            | 2(2.38%)       |         |
| Grade 3                                                       | 1(1.19%)            | 0(0.00%)       |         | 0(0.00%)            | 0(0.00%)       |         | 0(0.00%)            | 0(0.00%)       |         | 1(0.40%)            | 0(0.00%)       |         |

Data are n (%). Any refers to all the participants with any grade adverse reactions or reactions. Adverse reactions and reactions were graded according to the scale issued by the China State Food and Drug Administration. Grade 1=mild; Grade 2=moderate; Grade 3=severe.

**Appendix 7. Adverse reactions within 7 days after each vaccination dose and overall adverse reactions within 30 days after the third vaccination dose for 6~12 year-old group in phase 1/2**

|                                                              | 2 µg cohort (n=111) |                |         | 4 µg cohort (n=111) |                |         | 8 µg cohort (n=111) |                |         | Total (n=333)       |                |         |
|--------------------------------------------------------------|---------------------|----------------|---------|---------------------|----------------|---------|---------------------|----------------|---------|---------------------|----------------|---------|
|                                                              | vaccination (n=83)  | control (n=28) | P value | vaccination (n=84)  | control (n=27) | P value | vaccination (n=83)  | control (n=28) | P value | vaccination (n=250) | control (n=83) | P value |
| <b>Injection site adverse reactions after the third dose</b> |                     |                |         |                     |                |         |                     |                |         |                     |                |         |
| Any                                                          | 4(4.82%)            | 1(3.57%)       | 0.78    | 4(4.76%)            | 0(0.00%)       | 0.25    | 1(1.20%)            | 0(0.00%)       | 0.56    | 9(3.60%)            | 1(1.20%)       | 0.27    |
| Grade 1                                                      | 2(2.41%)            | 1(3.57%)       |         | 3(3.57%)            | 0(0.00%)       |         | 1(1.20%)            | 0(0.00%)       |         | 6(2.40%)            | 1(1.20%)       |         |
| Grade 2                                                      | 2(2.41%)            | 0(0.00%)       |         | 1(1.19%)            | 0(0.00%)       |         | 0(0.00%)            | 0(0.00%)       |         | 3(1.20%)            | 0(0.00%)       |         |
| Pain                                                         | 1(1.20%)            | 1(3.57%)       | 0.42    | 1(1.19%)            | 0(0.00%)       | 0.57    | 0(0.00%)            | 0(0.00%)       | 1       | 2(0.80%)            | 1(1.20%)       | 0.74    |
| Grade 1                                                      | 1(1.20%)            | 1(3.57%)       |         | 1(1.19%)            | 0(0.00%)       |         | 0(0.00%)            | 0(0.00%)       |         | 2(0.80%)            | 1(1.20%)       |         |
| Redness                                                      | 1(1.20%)            | 0(0.00%)       | 0.56    | 3(3.57%)            | 0(0.00%)       | 0.32    | 1(1.20%)            | 0(0.00%)       | 0.56    | 5(2.00%)            | 0(0.00%)       | 0.19    |
| Grade 1                                                      | 0(0.00%)            | 0(0.00%)       |         | 2(2.38%)            | 0(0.00%)       |         | 1(1.20%)            | 0(0.00%)       |         | 3(1.20%)            | 0(0.00%)       |         |
| Grade 2                                                      | 1(1.20%)            | 0(0.00%)       |         | 1(1.19%)            | 0(0.00%)       |         | 0(0.00%)            | 0(0.00%)       |         | 2(0.80%)            | 0(0.00%)       |         |
| Swelling                                                     | 1(1.20%)            | 0(0.00%)       | 0.56    | 0(0.00%)            | 0(0.00%)       | 1       | 0(0.00%)            | 0(0.00%)       | 1       | 1(0.40%)            | 0(0.00%)       | 0.56    |
| Grade 2                                                      | 1(1.20%)            | 0(0.00%)       |         | 0(0.00%)            | 0(0.00%)       |         | 0(0.00%)            | 0(0.00%)       |         | 1(0.40%)            | 0(0.00%)       |         |
| Itches                                                       | 1(1.20%)            | 0(0.00%)       | 0.56    | 0(0.00%)            | 0(0.00%)       | 1       | 0(0.00%)            | 0(0.00%)       | 1       | 1(0.40%)            | 0(0.00%)       | 0.56    |
| Grade 1                                                      | 1(1.20%)            | 0(0.00%)       |         | 0(0.00%)            | 0(0.00%)       |         | 0(0.00%)            | 0(0.00%)       |         | 1(0.40%)            | 0(0.00%)       |         |
| <b>Systemic adverse reactions after the third dose</b>       |                     |                |         |                     |                |         |                     |                |         |                     |                |         |
| Any                                                          | 0(0.00%)            | 0(0.00%)       | 1       | 1(1.19%)            | 0(0.00%)       | 0.57    | 1(1.20%)            | 0(0.00%)       | 0.56    | 2(0.80%)            | 0(0.00%)       | 0.41    |
| Grade 1                                                      | 0(0.00%)            | 0(0.00%)       |         | 1(1.19%)            | 0(0.00%)       |         | 0(0.00%)            | 0(0.00%)       |         | 1(0.40%)            | 0(0.00%)       |         |
| Grade 2                                                      | 0(0.00%)            | 0(0.00%)       |         | 0(0.00%)            | 0(0.00%)       |         | 1(1.20%)            | 0(0.00%)       |         | 1(0.40%)            | 0(0.00%)       |         |
| Fever                                                        | 0(0.00%)            | 0(0.00%)       | 1       | 0(0.00%)            | 0(0.00%)       | 1       | 1(1.20%)            | 0(0.00%)       | 0.56    | 1(0.40%)            | 0(0.00%)       | 0.56    |
| Grade 2                                                      | 0(0.00%)            | 0(0.00%)       |         | 0(0.00%)            | 0(0.00%)       |         | 1(1.20%)            | 0(0.00%)       |         | 1(0.40%)            | 0(0.00%)       |         |
| Cough                                                        | 0(0.00%)            | 0(0.00%)       | 1       | 1(1.19%)            | 0(0.00%)       | 0.57    | 0(0.00%)            | 0(0.00%)       | 1       | 1(0.40%)            | 0(0.00%)       | 0.56    |
| Grade 1                                                      | 0(0.00%)            | 0(0.00%)       |         | 1(1.19%)            | 0(0.00%)       |         | 0(0.00%)            | 0(0.00%)       |         | 1(0.40%)            | 0(0.00%)       |         |
| <b>Overall adverse reactions after the third dose</b>        |                     |                |         |                     |                |         |                     |                |         |                     |                |         |
| Any                                                          | 4(4.82%)            | 1(3.57%)       | 0.78    | 5(5.95%)            | 0(0.00%)       | 0.19    | 2(2.41%)            | 0(0.00%)       | 0.41    | 11(4.37%)           | 1(1.19%)       | 0.18    |
| Grade 1                                                      | 2(2.41%)            | 1(3.57%)       |         | 4(4.76%)            | 0(0.00%)       |         | 1(1.20%)            | 0(0.00%)       |         | 7(2.78%)            | 1(1.19%)       |         |
| Grade 2                                                      | 2(2.41%)            | 0(0.00%)       |         | 1(1.19%)            | 0(0.00%)       |         | 1(1.20%)            | 0(0.00%)       |         | 4(1.59%)            | 0(0.00%)       |         |

Data are n (%). Any refers to all the participants with any grade adverse reactions or reactions. Adverse reactions and reactions were graded according to the scale issued by the China State Food and Drug Administration. Grade 1=mild; Grade 2=moderate; Grade 3=severe.

**Appendix 8. Adverse reactions within 7 days after each vaccination dose and overall adverse reactions within 30 days after the first vaccination dose for 13~17 year-old group in phase 1/2**

|                                                              | 2 µg cohort (n=112) |                |         | 4 µg cohort (n=112) |                |         | 8 µg cohort (n=112) |                |         | Total (n=336)       |                |         |
|--------------------------------------------------------------|---------------------|----------------|---------|---------------------|----------------|---------|---------------------|----------------|---------|---------------------|----------------|---------|
|                                                              | vaccination (n=84)  | control (n=28) | P value | vaccination (n=84)  | control (n=28) | P value | vaccination (n=84)  | control (n=28) | P value | Vaccination (n=252) | control (n=84) | P value |
| <b>Injection site adverse reactions after the first dose</b> |                     |                |         |                     |                |         |                     |                |         |                     |                |         |
| Any                                                          | 4(4.76%)            | 2(7.14%)       | 0.63    | 9(10.71%)           | 0(0.00%)       | 0.071   | 4(4.76%)            | 0(0.00%)       | 0.24    | 17(6.75%)           | 2(2.38%)       | 0.13    |
| Grade 1                                                      | 4(4.76%)            | 2(7.14%)       |         | 9(10.71%)           | 0(0.00%)       |         | 4(4.76%)            | 0(0.00%)       |         | 17(6.75%)           | 2(2.38%)       |         |
| Pain                                                         | 4(4.76%)            | 0(0.00%)       | 0.24    | 8(9.52%)            | 0(0.00%)       | 0.090   | 3(3.57%)            | 0(0.00%)       | 0.31    | 15(5.95%)           | 0(0.00%)       | 0.022   |
| Grade 1                                                      | 4(4.76%)            | 0(0.00%)       |         | 8(9.52%)            | 0(0.00%)       |         | 3(3.57%)            | 0(0.00%)       |         | 15(5.95%)           | 0(0.00%)       |         |
| Redness                                                      | 0(0.00%)            | 1(3.57%)       | 0.082   | 0(0.00%)            | 0(0.00%)       | 1       | 1(1.19%)            | 0(0.00%)       | 0.56    | 1(0.39%)            | 1(1.19%)       | 0.41    |
| Grade 1                                                      | 0(0.00%)            | 1(3.57%)       |         | 0(0.00%)            | 0(0.00%)       |         | 1(1.19%)            | 0(0.00%)       |         | 1(0.39%)            | 1(1.19%)       |         |
| Swelling                                                     | 0(0.00%)            | 1(3.57%)       | 0.082   | 0(0.00%)            | 0(0.00%)       | 1       | 0(0.00%)            | 0(0.00%)       | 1       | 0(0.00%)            | 1(1.19%)       | 0.083   |
| Grade 1                                                      | 0(0.00%)            | 1(3.57%)       |         | 0(0.00%)            | 0(0.00%)       |         | 0(0.00%)            | 0(0.00%)       |         | 0(0.00%)            | 1(1.19%)       |         |
| Itches                                                       | 0(0.00%)            | 0(0.00%)       | 1       | 1(1.19%)            | 0(0.00%)       | 0.56    | 0(0.00%)            | 0(0.00%)       | 1       | 1(0.39%)            | 0(0.00%)       | 0.56    |
| Grade 1                                                      | 0(0.00%)            | 0(0.00%)       |         | 1(1.19%)            | 0(0.00%)       |         | 0(0.00%)            | 0(0.00%)       |         | 1(0.39%)            | 0(0.00%)       |         |
| <b>Systemic adverse reactions after the first dose</b>       |                     |                |         |                     |                |         |                     |                |         |                     |                |         |
| Any                                                          | 18(21.43%)          | 0(0.00%)       | 0.0075  | 12(14.29%)          | 0(0.00%)       | 0.034   | 1(1.19%)            | 7(25.00%)      | <0.0001 | 43(17.06%)          | 12(14.29%)     | 0.55    |
| Grade 1                                                      | 17(20.24%)          | 0(0.00%)       |         | 12(14.29%)          | 0(0.00%)       |         | 1(1.19%)            | 6(21.43%)      |         | 42(16.67%)          | 11(13.10%)     |         |
| Grade 2                                                      | 1(1.19%)            | 0(0.00%)       |         | 0(0.00%)            | 0(0.00%)       |         | 0(0.00%)            | 1(3.57%)       |         | 1(0.39%)            | 1(1.19%)       |         |
| Fever                                                        | 6(7.14%)            | 0(0.00%)       | 0.15    | 6(7.14%)            | 0(0.00%)       | 0.15    | 1(1.19%)            | 5(17.86%)      | 0.0007  | 13(0.39%)           | 5(5.95%)       | 0.78    |
| Grade 1                                                      | 6(7.14%)            | 0(0.00%)       |         | 6(7.14%)            | 0(0.00%)       |         | 1(1.19%)            | 5(17.86%)      |         | 13(4.76%)           | 5(5.95%)       |         |
| Fatigue                                                      | 3(3.57%)            | 0(0.00%)       | 0.31    | 0(0.00%)            | 0(0.00%)       | 1       | 0(0.00%)            | 0(0.00%)       | 1       | 2(0.79%)            | 0(0.00%)       | 0.41    |
| Grade 1                                                      | 2(2.38%)            | 0(0.00%)       |         | 0(0.00%)            | 0(0.00%)       |         | 0(0.00%)            | 0(0.00%)       |         | 1(0.39%)            | 0(0.00%)       |         |
| Grade 2                                                      | 1(1.19%)            | 0(0.00%)       |         | 0(0.00%)            | 0(0.00%)       |         | 0(0.00%)            | 0(0.00%)       |         | 0(0.00%)            | 0(0.00%)       |         |
| Diarrhea                                                     | 0(0.00%)            | 0(0.00%)       | 1       | 4(4.76%)            | 0(0.00%)       | 0.24    | 0(0.00%)            | 2(7.14%)       | 0.013   | 4(1.59%)            | 2(2.38%)       | 0.63    |
| Grade 1                                                      | 0(0.00%)            | 0(0.00%)       |         | 4(4.76%)            | 0(0.00%)       |         | 0(0.00%)            | 1(3.57%)       |         | 4(1.59%)            | 1(1.19%)       |         |
| Grade 2                                                      | 0(0.00%)            | 0(0.00%)       |         | 0(0.00%)            | 0(0.00%)       |         | 0(0.00%)            | 1(3.57%)       |         | 0(0.00%)            | 1(1.19%)       |         |
| Headache                                                     | 1(1.19%)            | 0(0.00%)       | 0.56    | 1(1.19%)            | 0(0.00%)       | 0.56    | 0(0.00%)            | 1(3.57%)       | 0.082   | 3(1.90%)            | 0(0.00%)       | 0.31    |
| Grade 1                                                      | 1(1.19%)            | 0(0.00%)       |         | 1(1.19%)            | 0(0.00%)       |         | 0(0.00%)            | 1(3.57%)       |         | 3(1.90%)            | 0(0.00%)       |         |
| Cough                                                        | 0(0.00%)            | 0(0.00%)       | 1       | 1(1.19%)            | 0(0.00%)       | 0.56    | 0(0.00%)            | 0(0.00%)       | 1       | 1(0.39%)            | 0(0.00%)       | 0.56    |
| Grade 1                                                      | 0(0.00%)            | 0(0.00%)       |         | 1(1.19%)            | 0(0.00%)       |         | 0(0.00%)            | 0(0.00%)       |         | 1(0.39%)            | 0(0.00%)       |         |
| Nausea                                                       | 2(2.38%)            | 0(0.00%)       | 0.41    | 0(0.00%)            | 0(0.00%)       | 1       | 0(0.00%)            | 0(0.00%)       | 1       | 2(0.79%)            | 0(0.00%)       | 0.41    |
| Grade 1                                                      | 2(2.38%)            | 0(0.00%)       |         | 0(0.00%)            | 0(0.00%)       |         | 0(0.00%)            | 0(0.00%)       |         | 2(0.79%)            | 0(0.00%)       |         |
| Muscle pain                                                  | 3(3.57%)            | 0(0.00%)       | 0.31    | 0(0.00%)            | 0(0.00%)       | 1       | 0(0.00%)            | 0(0.00%)       | 1       | 3(1.90%)            | 0(0.00%)       | 0.31    |
| Grade 1                                                      | 3(3.57%)            | 0(0.00%)       |         | 0(0.00%)            | 0(0.00%)       |         | 0(0.00%)            | 0(0.00%)       |         | 3(1.90%)            | 0(0.00%)       |         |
| Vomiting                                                     | 2(2.38%)            | 0(0.00%)       | 0.41    | 0(0.00%)            | 0(0.00%)       | 1       | 0(0.00%)            | 0(0.00%)       | 1       | 2(0.79%)            | 0(0.00%)       | 0.41    |
| Grade 1                                                      | 2(2.38%)            | 0(0.00%)       |         | 0(0.00%)            | 0(0.00%)       |         | 0(0.00%)            | 0(0.00%)       |         | 2(0.79%)            | 0(0.00%)       |         |
| Dysphagia                                                    | 1(1.19%)            | 0(0.00%)       | 0.56    | 0(0.00%)            | 0(0.00%)       | 1       | 0(0.00%)            | 0(0.00%)       | 1       | 1(0.39%)            | 0(0.00%)       | 0.56    |
| Grade 1                                                      | 1(1.19%)            | 0(0.00%)       |         | 0(0.00%)            | 0(0.00%)       |         | 0(0.00%)            | 0(0.00%)       |         | 1(0.39%)            | 0(0.00%)       |         |
| <b>Overall adverse reactions after the first dose</b>        |                     |                |         |                     |                |         |                     |                |         |                     |                |         |
| Any                                                          | 24(28.57%)          | 2(7.14%)       | 0.020   | 21(0.25%)           | 0(0.00%)       | 0.0033  | 5(5.95%)            | 7(25.00%)      | 0.048   | 62(24.60%)          | 14(16.67%)     | 0.13    |
| Grade 1                                                      | 23(27.38%)          | 2(7.14%)       |         | 21(0.25%)           | 0(0.00%)       |         | 5(5.95%)            | 6(21.43%)      |         | 51(20.24%)          | 13(15.48%)     |         |
| Grade 2                                                      | 1(1.19%)            | 0(0.00%)       |         | 0(0.00%)            | 0(0.00%)       |         | 0(0.00%)            | 1(3.57%)       |         | 1(0.39%)            | 1(1.19%)       |         |

Data are n (%). Any refers to all the participants with any grade adverse reactions or reactions. Adverse reactions and reactions were graded according to the scale issued by the China State Food and Drug Administration. Grade 1=mild; Grade 2=moderate; Grade 3=severe.

**Appendix 9. Adverse reactions within 7 days after each vaccination dose and overall adverse reactions within 30 days after the second vaccination dose for 13~17 year-old group in phase 1/2**

|                                                               | 2 µg cohort (n=112) |                |         | 4 µg cohort (n=109) |                |         | 8 µg cohort (n=112) |                |         | Total (n=333)       |                |         |
|---------------------------------------------------------------|---------------------|----------------|---------|---------------------|----------------|---------|---------------------|----------------|---------|---------------------|----------------|---------|
|                                                               | vaccination (n=84)  | control (n=28) | P value | vaccination (n=83)  | control (n=26) | P value | vaccination (n=84)  | control (n=28) | P value | vaccination (n=251) | control (n=82) | P value |
| <b>Injection site adverse reactions after the second dose</b> |                     |                |         |                     |                |         |                     |                |         |                     |                |         |
| Any                                                           | 1(1.19%)            | 0(0.00%)       | 0.56    | 4(4.82%)            | 0(0.00%)       | 0.25    | 2(2.38%)            | 0(0.00%)       | 1       | 7(2.79%)            | 0(0.00%)       | 0.13    |
| Grade 1                                                       | 1(1.19%)            | 0(0.00%)       |         | 4(4.82%)            | 0(0.00%)       |         | 2(2.38%)            | 0(0.00%)       |         | 7(2.79%)            | 0(0.00%)       |         |
| Pain                                                          | 0(0.00%)            | 0(0.00%)       | 1       | 4(4.82%)            | 0(0.00%)       | 0.25    | 0(0.00%)            | 0(0.00%)       | 1       | 4(1.59%)            | 0(0.00%)       | 0.25    |
| Grade 1                                                       | 0(0.00%)            | 0(0.00%)       |         | 4(4.82%)            | 0(0.00%)       |         | 0(0.00%)            | 0(0.00%)       |         | 4(1.59%)            | 0(0.00%)       |         |
| Redness                                                       | 1(1.19%)            | 0(0.00%)       | 0.56    | 0(0.00%)            | 0(0.00%)       | 1       | 2(2.38%)            | 0(0.00%)       | 1       | 3(1.20%)            | 0(0.00%)       | 0.32    |
| Grade 1                                                       | 1(1.19%)            | 0(0.00%)       |         | 0(0.00%)            | 0(0.00%)       |         | 2(2.38%)            | 0(0.00%)       |         | 3(1.20%)            | 0(0.00%)       |         |
| <b>Systemic adverse reactions after the second dose</b>       |                     |                |         |                     |                |         |                     |                |         |                     |                |         |
| Any                                                           | 8(9.53%)            | 0(0.00%)       | 0.090   | 3(3.61%)            | 0(0.00%)       | 0.33    | 9(10.71%)           | 2(7.14%)       | 0.73    | 20(7.97%)           | 2(2.44%)       | 0.080   |
| Grade 1                                                       | 6(7.14%)            | 0(0.00%)       |         | 3(3.61%)            | 0(0.00%)       |         | 6(7.14%)            | 2(7.14%)       |         | 15(5.98%)           | 2(2.38%)       |         |
| Grade 2                                                       | 2(2.38%)            | 0(0.00%)       |         | 0(0.00%)            | 0(0.00%)       |         | 3(3.57%)            | 0(0.00%)       |         | 5(1.99%)            | 0(0.00%)       |         |
| Fever                                                         | 3(3.57%)            | 0(0.00%)       | 0.31    | 2(2.41%)            | 0(0.00%)       | 0.42    | 4(4.76%)            | 2(7.14%)       | 0.64    | 9(3.59%)            | 2(2.44%)       | 0.58    |
| Grade 1                                                       | 2(2.38%)            | 0(0.00%)       |         | 2(2.41%)            | 0(0.00%)       |         | 3(3.57%)            | 2(7.14%)       |         | 7(2.79%)            | 2(2.44%)       |         |
| Grade 2                                                       | 1(1.19%)            | 0(0.00%)       |         | 0(0.00%)            | 0(0.00%)       |         | 1(1.19%)            | 0(0.00%)       |         | 2(0.80%)            | 0(0.00%)       |         |
| Fatigue                                                       | 1(1.19%)            | 0(0.00%)       | 0.56    | 0(0.00%)            | 0(0.00%)       | 1       | 0(0.00%)            | 0(0.00%)       | 1       | 0(0.00%)            | 0(0.00%)       | 1       |
| Grade 1                                                       | 1(1.19%)            | 0(0.00%)       |         | 0(0.00%)            | 0(0.00%)       |         | 0(0.00%)            | 0(0.00%)       |         | 1(0.40%)            | 0(0.00%)       |         |
| Nausea                                                        | 0(0.00%)            | 0(0.00%)       | 1       | 0(0.00%)            | 0(0.00%)       | 1       | 2(2.38%)            | 0(0.00%)       | 1       | 2(0.80%)            | 0(0.00%)       | 0.42    |
| Grade 1                                                       | 0(0.00%)            | 0(0.00%)       |         | 0(0.00%)            | 0(0.00%)       |         | 1(1.19%)            | 0(0.00%)       |         | 1(0.40%)            | 0(0.00%)       |         |
| Grade 2                                                       | 0(0.00%)            | 0(0.00%)       |         | 0(0.00%)            | 0(0.00%)       |         | 1(1.19%)            | 0(0.00%)       |         | 1(0.40%)            | 0(0.00%)       |         |
| Cough                                                         | 1(1.19%)            | 0(0.00%)       | 0.56    | 1(1.20%)            | 0(0.00%)       | 0.57    | 1(1.19%)            | 0(0.00%)       | 1       | 3(1.20%)            | 0(0.00%)       | 0.31    |
| Grade 1                                                       | 0(0.00%)            | 0(0.00%)       |         | 1(1.20%)            | 0(0.00%)       |         | 0(0.00%)            | 0(0.00%)       |         | 1(0.40%)            | 0(0.00%)       |         |
| Grade 2                                                       | 1(1.19%)            | 0(0.00%)       |         | 0(0.00%)            | 0(0.00%)       |         | 1(1.19%)            | 0(0.00%)       |         | 2(0.80%)            | 0(0.00%)       |         |
| Vomiting                                                      | 0(0.00%)            | 0(0.00%)       | 1       | 0(0.00%)            | 0(0.00%)       | 1       | 2(2.38%)            | 0(0.00%)       | 1       | 2(0.80%)            | 0(0.00%)       | 0.42    |
| Grade 1                                                       | 0(0.00%)            | 0(0.00%)       |         | 0(0.00%)            | 0(0.00%)       |         | 2(2.38%)            | 0(0.00%)       |         | 2(0.80%)            | 0(0.00%)       |         |
| Dyspnea                                                       | 1(1.19%)            | 0(0.00%)       | 0.56    | 0(0.00%)            | 0(0.00%)       | 1       | 0(0.00%)            | 0(0.00%)       | 1       | 1(0.40%)            | 0(0.00%)       | 0.57    |
| Grade 1                                                       | 1(1.19%)            | 0(0.00%)       |         | 0(0.00%)            | 0(0.00%)       |         | 0(0.00%)            | 0(0.00%)       |         | 1(0.40%)            | 0(0.00%)       |         |
| Muscle pain                                                   | 1(1.19%)            | 0(0.00%)       | 0.56    | 0(0.00%)            | 0(0.00%)       | 1       | 0(0.00%)            | 0(0.00%)       | 1       | 1(0.39%)            | 0(0.00%)       | 0.57    |
| Grade 1                                                       | 1(1.19%)            | 0(0.00%)       |         | 0(0.00%)            | 0(0.00%)       |         | 0(0.00%)            | 0(0.00%)       |         | 1(0.39%)            | 0(0.00%)       |         |
| Headache                                                      | 1(1.19%)            | 0(0.00%)       | 0.56    | 0(0.00%)            | 0(0.00%)       | 1       | 0(0.00%)            | 0(0.00%)       | 1       | 1(0.39%)            | 0(0.00%)       | 0.57    |
| Grade 1                                                       | 1(1.19%)            | 0(0.00%)       |         | 0(0.00%)            | 0(0.00%)       |         | 0(0.00%)            | 0(0.00%)       |         | 1(0.39%)            | 0(0.00%)       |         |
| <b>Overall adverse reactions after the second dose</b>        |                     |                |         |                     |                |         |                     |                |         |                     |                |         |
| Any                                                           | 9(10.71%)           | 0(0.00%)       | 0.11    | 7(8.43%)            | 0(0.00%)       | 0.13    | 11(13.10%)          | 2(7.14%)       | 0.51    | 27(10.76%)          | 2(2.44%)       | 0.020   |
| Grade 1                                                       | 7(8.33%)            | 0(0.00%)       |         | 7(8.43%)            | 0(0.00%)       |         | 8(9.53%)            | 2(7.14%)       |         | 22(8.76%)           | 2(2.44%)       |         |
| Grade 2                                                       | 2(2.38%)            | 0(0.00%)       |         | 0(0.00%)            | 0(0.00%)       |         | 3(3.57%)            | 0(0.00%)       |         | 5(1.20%)            | 0(0.00%)       |         |

Data are n (%). Any refers to all the participants with any grade adverse reactions or reactions. Adverse reactions and reactions were graded according to the scale issued by the China State Food and Drug Administration. Grade 1=mild; Grade 2=moderate; Grade 3=severe.

**Appendix 10. Adverse reactions within 7 days after each vaccination dose and overall adverse reactions within 30 days after the third vaccination dose for 13~17 year-old group in phase 1/2**

|                                                              | 2 µg cohort (n=112) |                |         | 4 µg cohort (n=109) |                |         | 8 µg cohort (n=112) |                |         | Total               |                |         |
|--------------------------------------------------------------|---------------------|----------------|---------|---------------------|----------------|---------|---------------------|----------------|---------|---------------------|----------------|---------|
|                                                              | vaccination (n=84)  | control (n=28) | P value | vaccination (n=83)  | control (n=26) | P value | vaccination (n=84)  | control (n=28) | P value | vaccination (n=251) | control (n=82) | P value |
| <b>Injection site adverse reactions after the third dose</b> |                     |                |         |                     |                |         |                     |                |         |                     |                |         |
| Any                                                          | 5(5.95%)            | 2(7.14%)       | 0.83    | 0(0.00%)            | 0(0.00%)       | 1       | 0(0.00%)            | 1(3.57%)       | 0.082   | 6(2.39%)            | 2(2.44%)       | 0.98    |
| Grade 1                                                      | 4(4.76%)            | 2(7.14%)       |         | 0(0.00%)            | 0(0.00%)       |         | 0(0.00%)            | 1(3.57%)       |         | 5(1.99%)            | 2(2.44%)       |         |
| Grade 2                                                      | 1(1.19%)            | 0(0.00%)       |         | 0(0.00%)            | 0(0.00%)       |         | 0(0.00%)            | 0(0.00%)       |         | 1(0.40%)            | 0(0.00%)       |         |
| Pain                                                         | 1(1.19%)            | 0(0.00%)       | 0.56    | 0(0.00%)            | 0(0.00%)       | 1       | 0(0.00%)            | 0(0.00%)       | 1       | 1(0.40%)            | 0(0.00%)       | 0.57    |
| Grade 1                                                      | 1(1.19%)            | 1(3.57%)       |         | 0(0.00%)            | 0(0.00%)       |         | 0(0.00%)            | 0(0.00%)       |         | 1(0.40%)            | 1(1.22%)       |         |
| Redness                                                      | 3(3.57%)            | 1(3.57%)       | 1       | 0(0.00%)            | 0(0.00%)       | 1       | 0(0.00%)            | 0(0.00%)       | 1       | 4(1.59%)            | 0(0.00%)       | 0.25    |
| Grade 1                                                      | 2(2.38%)            | 1(3.57%)       |         | 0(0.00%)            | 0(0.00%)       |         | 0(0.00%)            | 0(0.00%)       |         | 3(1.20%)            | 1(1.22%)       |         |
| Grade 2                                                      | 1(1.19%)            | 0(0.00%)       |         | 0(0.00%)            | 0(0.00%)       |         | 0(0.00%)            | 0(0.00%)       |         | 1(0.40%)            | 0(0.00%)       |         |
| Itches                                                       | 1(1.19%)            | 0(0.00%)       | 0.56    | 0(0.00%)            | 0(0.00%)       | 1       | 0(0.00%)            | 0(0.00%)       | 1       | 1(0.40%)            | 0(0.00%)       | 0.57    |
| Grade 1                                                      | 1(1.19%)            | 0(0.00%)       |         | 0(0.00%)            | 0(0.00%)       |         | 0(0.00%)            | 0(0.00%)       |         | 1(0.40%)            | 0(0.00%)       |         |
| <b>Systemic adverse reactions after the third dose</b>       |                     |                |         |                     |                |         |                     |                |         |                     |                |         |
| Any                                                          | 2(2.38%)            | 0(0.00%)       | 0.41    | 2(2.41%)            | 1(3.85%)       | 0.78    | 2(2.38%)            | 0(0.00%)       | 0.41    | 6(2.39%)            | 1(1.22%)       | 0.52    |
| Grade 1                                                      | 1(1.19%)            | 0(0.00%)       |         | 2(2.41%)            | 1(3.85%)       |         | 2(2.38%)            | 0(0.00%)       |         | 5(1.99%)            | 1(1.22%)       |         |
| Grade 2                                                      | 1(1.19%)            | 0(0.00%)       |         | 0(0.00%)            | 0(0.00%)       |         | 0(0.00%)            | 0(0.00%)       |         | 1(0.40%)            | 0(0.00%)       |         |
| Fever                                                        | 2(2.38%)            | 0(0.00%)       | 0.41    | 1(1.20%)            | 1(3.85%)       | 0.38    | 1(1.19%)            | 0(0.00%)       | 0.56    | 4(1.59%)            | 0(0.00%)       | 0.25    |
| Grade 1                                                      | 1(1.19%)            | 0(0.00%)       |         | 1(1.20%)            | 1(3.85%)       |         | 1(1.19%)            | 0(0.00%)       |         | 3(1.20%)            | 1(1.22%)       |         |
| Grade 2                                                      | 1(1.19%)            | 0(0.00%)       |         | 0(0.00%)            | 0(0.00%)       |         | 0(0.00%)            | 0(0.00%)       |         | 1(0.40%)            | 0(0.00%)       |         |
| Cough                                                        | 0(0.00%)            | 0(0.00%)       | 1       | 1(1.20%)            | 0(0.00%)       | 0.57    | 1(1.19%)            | 0(0.00%)       | 0.56    | 2(0.80%)            | 0(0.00%)       | 0.42    |
| Grade 1                                                      | 0(0.00%)            | 0(0.00%)       |         | 1(1.20%)            | 0(0.00%)       |         | 1(1.19%)            | 0(0.00%)       |         | 2(0.80%)            | 0(0.00%)       |         |
| <b>Overall adverse reactions after the third dose</b>        |                     |                |         |                     |                |         |                     |                |         |                     |                |         |
| Any                                                          | 7(8.33%)            | 2(7.14%)       | 0.84    | 2(2.41%)            | 1(3.85%)       | 0.70    | 2(2.38%)            | 1(3.57%)       | 0.74    | 11(4.38%)           | 4(4.88%)       | 0.85    |
| Grade 1                                                      | 5(5.95%)            | 2(7.14%)       |         | 2(2.41%)            | 1(3.85%)       |         | 2(2.38%)            | 1(3.57%)       |         | 9(3.59%)            | 4(4.88%)       |         |
| Grade 2                                                      | 2(2.38%)            | 0(0.00%)       |         | 0(0.00%)            | 0(0.00%)       |         | 0(0.00%)            | 0(0.00%)       |         | 2(0.80%)            | 0(0.00%)       |         |

Data are n (%). Any refers to all the participants with any grade adverse reactions or reactions. Adverse reactions and reactions were graded according to the scale issued by the China State Food and Drug Administration. Grade 1=mild; Grade 2=moderate; Grade 3=severe.

**Appendix 11. Abnormal changes of laboratory tests within 4 days after each vaccination in phase 1 in 3~5 year-old cohort.**

| Abnormal in Laboratory measures |         | 2 µg (n=32)        |               | 4 µg (n=32)        |               | 8 µg (n=32)        |               | Total (n=96)       |                |
|---------------------------------|---------|--------------------|---------------|--------------------|---------------|--------------------|---------------|--------------------|----------------|
|                                 |         | vaccination (n=24) | control (n=8) | vaccination (n=24) | control (n=8) | vaccination (n=24) | control (n=8) | vaccination (n=72) | control (n=24) |
| WBC*                            | Any     | 10(41.67%)         | 0(0.00%)      | 4(16.67%)          | 5(62.50%)     | 3(12.50%)          | 1(12.50%)     | 17(23.61%)         | 6(25.00%)      |
|                                 | Grade 1 | 6(25.00%)          | 0(0.00%)      | 4(16.67%)          | 4(50.00%)     | 3(12.50%)          | 1(12.50%)     | 13(18.06%)         | 5(20.83%)      |
|                                 | Grade 2 | 2(8.33%)           | 0(0.00%)      | 0(0.00%)           | 1(12.50%)     | 0(0.00%)           | 0(0.00%)      | 2(2.78%)           | 1(4.17%)       |
|                                 | Grade 3 | 2(8.33%)           | 0(0.00%)      | 0(0.00%)           | 0(0.00%)      | 0(0.00%)           | 0(0.00%)      | 2(2.78%)           | 0(0.00%)       |
| LYM                             | Any     | 0(0.00%)           | 0(0.00%)      | 1(4.17%)           | 0(0.00%)      | 0(0.00%)           | 0(0.00%)      | 1(1.39%)           | 0(0.00%)       |
|                                 | Grade 1 | 0(0.00%)           | 0(0.00%)      | 1(4.17%)           | 0(0.00%)      | 0(0.00%)           | 0(0.00%)      | 1(1.39%)           | 0(0.00%)       |
|                                 | Grade 2 | 0(0.00%)           | 0(0.00%)      | 0(0.00%)           | 0(0.00%)      | 0(0.00%)           | 0(0.00%)      | 0(0.00%)           | 0(0.00%)       |
|                                 | Grade 3 | 0(0.00%)           | 0(0.00%)      | 0(0.00%)           | 0(0.00%)      | 0(0.00%)           | 0(0.00%)      | 0(0.00%)           | 0(0.00%)       |
| ALT                             | Any     | 0(0.00%)           | 0(0.00%)      | 0(0.00%)           | 0(0.00%)      | 1(4.17%)           | 0(0.00%)      | 1(1.39%)           | 0(0.00%)       |
|                                 | Grade 1 | 0(0.00%)           | 0(0.00%)      | 0(0.00%)           | 0(0.00%)      | 1(4.17%)           | 0(0.00%)      | 1(1.39%)           | 0(0.00%)       |
|                                 | Grade 2 | 0(0.00%)           | 0(0.00%)      | 0(0.00%)           | 0(0.00%)      | 0(0.00%)           | 0(0.00%)      | 0(0.00%)           | 0(0.00%)       |
|                                 | Grade 3 | 0(0.00%)           | 0(0.00%)      | 0(0.00%)           | 0(0.00%)      | 0(0.00%)           | 0(0.00%)      | 0(0.00%)           | 0(0.00%)       |
| AST                             | Any     | 1(4.17%)           | 0(0.00%)      | 0(0.00%)           | 0(0.00%)      | 2(8.33%)           | 0(0.00%)      | 3(4.17%)           | 0(0.00%)       |
|                                 | Grade 1 | 1(4.17%)           | 0(0.00%)      | 0(0.00%)           | 0(0.00%)      | 2(8.33%)           | 0(0.00%)      | 3(4.17%)           | 0(0.00%)       |
|                                 | Grade 2 | 0(0.00%)           | 0(0.00%)      | 0(0.00%)           | 0(0.00%)      | 0(0.00%)           | 0(0.00%)      | 0(0.00%)           | 0(0.00%)       |
|                                 | Grade 3 | 0(0.00%)           | 0(0.00%)      | 0(0.00%)           | 0(0.00%)      | 0(0.00%)           | 0(0.00%)      | 0(0.00%)           | 0(0.00%)       |
| GLU                             | Any     | 1(4.17%)           | 0(0.00%)      | 2(8.33%)           | 0(0.00%)      | 0(0.00%)           | 0(0.00%)      | 3(4.17%)           | 0(0.00%)       |
|                                 | Grade 1 | 1(4.17%)           | 0(0.00%)      | 2(8.33%)           | 0(0.00%)      | 0(0.00%)           | 0(0.00%)      | 3(4.17%)           | 0(0.00%)       |
|                                 | Grade 2 | 0(0.00%)           | 0(0.00%)      | 0(0.00%)           | 0(0.00%)      | 0(0.00%)           | 0(0.00%)      | 0(0.00%)           | 0(0.00%)       |
|                                 | Grade 3 | 0(0.00%)           | 0(0.00%)      | 0(0.00%)           | 0(0.00%)      | 0(0.00%)           | 0(0.00%)      | 0(0.00%)           | 0(0.00%)       |

Data are n (%). WBC, white blood cells; HGB, hemoglobin; ALT, alanine aminotransferase; BUN, blood urea nitrogen; AST, aspartate aminotransferase; GLU, blood glucose; TBIL, serum total bilirubin; PRO, urinary protein; U-GLU, urinary glucose. \* Elevations in white blood cell count following vaccination were observed.

**Appendix 12. Abnormal changes of laboratory tests within 4 days after each vaccination in phase 1 in 6~12 year-old cohort.**

| Abnormal in Laboratory measures |         | 2 µg (n=32)        |               | 4 µg (n=32)        |               | 8 µg (n=32)        |               | Total (n=96)       |                |
|---------------------------------|---------|--------------------|---------------|--------------------|---------------|--------------------|---------------|--------------------|----------------|
|                                 |         | vaccination (n=24) | control (n=8) | vaccination (n=24) | control (n=8) | vaccination (n=24) | control (n=8) | vaccination (n=72) | control (n=24) |
| WBC*                            | Any     | 3(12.50%)          | 1(12.50%)     | 7(29.17%)          | 3(37.50%)     | 1(4.17%)           | 1(12.50%)     | 11(15.28%)         | 5(20.83%)      |
|                                 | Grade 1 | 3(12.50%)          | 1(12.50%)     | 6(25.00%)          | 2(25.00%)     | 0(0.00%)           | 1(12.50%)     | 9(12.50%)          | 4(16.67%)      |
|                                 | Grade 2 | 0(0.00%)           | 0(0.00%)      | 0(0.00%)           | 1(12.50%)     | 1(4.17%)           | 0(0.00%)      | 1(1.39%)           | 1(4.17%)       |
|                                 | Grade 3 | 0(0.00%)           | 0(0.00%)      | 1(4.17%)           | 0(0.00%)      | 0(0.00%)           | 0(0.00%)      | 1(1.39%)           | 0(0.00%)       |
| ALT                             | Any     | 0(0.00%)           | 0(0.00%)      | 0(0.00%)           | 0(0.00%)      | 1(4.17%)           | 2(25.00%)     | 1(1.39%)           | 2(8.33%)       |
|                                 | Grade 1 | 0(0.00%)           | 0(0.00%)      | 0(0.00%)           | 0(0.00%)      | 1(4.17%)           | 2(25.00%)     | 1(1.39%)           | 2(8.33%)       |
|                                 | Grade 2 | 0(0.00%)           | 0(0.00%)      | 0(0.00%)           | 0(0.00%)      | 0(0.00%)           | 0(0.00%)      | 0(0.00%)           | 0(0.00%)       |
|                                 | Grade 3 | 0(0.00%)           | 0(0.00%)      | 0(0.00%)           | 0(0.00%)      | 0(0.00%)           | 0(0.00%)      | 0(0.00%)           | 0(0.00%)       |
| AST                             | Any     | 1(4.17%)           | 0(0.00%)      | 0(0.00%)           | 0(0.00%)      | 1(4.17%)           | 2(25.00%)     | 2(2.78%)           | 2(8.33%)       |
|                                 | Grade 1 | 1(4.17%)           | 0(0.00%)      | 0(0.00%)           | 0(0.00%)      | 0(0.00%)           | 2(25.00%)     | 1(1.39%)           | 2(8.33%)       |
|                                 | Grade 2 | 0(0.00%)           | 0(0.00%)      | 0(0.00%)           | 0(0.00%)      | 1(4.17%)           | 0(0.00%)      | 1(1.39%)           | 0(0.00%)       |
|                                 | Grade 3 | 0(0.00%)           | 0(0.00%)      | 0(0.00%)           | 0(0.00%)      | 0(0.00%)           | 0(0.00%)      | 0(0.00%)           | 0(0.00%)       |
| GLU                             | Any     | 2(8.33%)           | 0(0.00%)      | 1(4.17%)           | 1(12.50%)     | 0(0.00%)           | 0(0.00%)      | 3(4.17%)           | 1(4.17%)       |
|                                 | Grade 1 | 2(8.33%)           | 0(0.00%)      | 1(4.17%)           | 1(12.50%)     | 0(0.00%)           | 0(0.00%)      | 3(4.17%)           | 1(4.17%)       |
|                                 | Grade 2 | 0(0.00%)           | 0(0.00%)      | 0(0.00%)           | 0(0.00%)      | 0(0.00%)           | 0(0.00%)      | 0(0.00%)           | 0(0.00%)       |
|                                 | Grade 3 | 0(0.00%)           | 0(0.00%)      | 0(0.00%)           | 0(0.00%)      | 0(0.00%)           | 0(0.00%)      | 0(0.00%)           | 0(0.00%)       |
| TBIL                            | Any     | 3(12.50%)          | 4(50.00%)     | 0(0.00%)           | 0(0.00%)      | 1(4.17%)           | 0(0.00%)      | 4(5.56%)           | 4(16.67%)      |
|                                 | Grade 1 | 2(8.33%)           | 3(37.50%)     | 0(0.00%)           | 0(0.00%)      | 1(4.17%)           | 0(0.00%)      | 3(4.17%)           | 3(12.50%)      |
|                                 | Grade 2 | 1(4.17%)           | 1(12.50%)     | 0(0.00%)           | 0(0.00%)      | 0(0.00%)           | 0(0.00%)      | 1(1.39%)           | 1(4.17%)       |
|                                 | Grade 3 | 0(0.00%)           | 0(0.00%)      | 0(0.00%)           | 0(0.00%)      | 0(0.00%)           | 0(0.00%)      | 0(0.00%)           | 0(0.00%)       |
| PRO                             | Any     | 0(0.00%)           | 1(12.50%)     | 2(8.33%)           | 0(0.00%)      | 2(8.33%)           | 0(0.00%)      | 4(5.56%)           | 1(4.17%)       |
|                                 | Grade 1 | 0(0.00%)           | 1(12.50%)     | 1(4.17%)           | 0(0.00%)      | 1(4.17%)           | 0(0.00%)      | 2(2.78%)           | 1(4.17%)       |
|                                 | Grade 2 | 0(0.00%)           | 0(0.00%)      | 1(4.17%)           | 0(0.00%)      | 1(4.17%)           | 0(0.00%)      | 2(2.78%)           | 0(0.00%)       |
|                                 | Grade 3 | 0(0.00%)           | 0(0.00%)      | 0(0.00%)           | 0(0.00%)      | 0(0.00%)           | 0(0.00%)      | 0(0.00%)           | 0(0.00%)       |

Data are n (%). WBC, white blood cells; HGB, hemoglobin; ALT, alanine aminotransferase; BUN, blood urea nitrogen; AST, aspartate aminotransferase; GLU, blood glucose; TBIL, serum total bilirubin; PRO, urinary protein; U-GLU, urinary glucose. \* Elevations in white blood cell count following vaccination were observed.

**Appendix 13. Abnormal changes of laboratory tests within 4 days after each vaccination in phase 1 in 13~17 year-old cohort.**

| Abnormal in Laboratory measures |         | 2 µg (n=32)        |               | 4 µg (n=32)        |               | 8 µg (n=32)        |               | Total (n=96)       |                |
|---------------------------------|---------|--------------------|---------------|--------------------|---------------|--------------------|---------------|--------------------|----------------|
|                                 |         | vaccination (n=24) | control (n=8) | vaccination (n=24) | control (n=8) | vaccination (n=24) | control (n=8) | vaccination (n=72) | control (n=24) |
| WBC*                            | Any     | 1(4.17%)           | 0(0.00%)      | 1(4.17%)           | 1(12.50%)     | 0(0.00%)           | 1(12.50%)     | 2(2.78%)           | 2(8.33%)       |
|                                 | Grade 1 | 1(4.17%)           | 0(0.00%)      | 1(4.17%)           | 1(12.50%)     | 0(0.00%)           | 0(0.00%)      | 2(2.78%)           | 1(4.17%)       |
|                                 | Grade 2 | 0(0.00%)           | 0(0.00%)      | 0(0.00%)           | 0(0.00%)      | 0(0.00%)           | 1(12.50%)     | 0(0.00%)           | 1(4.17%)       |
|                                 | Grade 3 | 0(0.00%)           | 0(0.00%)      | 0(0.00%)           | 0(0.00%)      | 0(0.00%)           | 0(0.00%)      | 0(0.00%)           | 0(0.00%)       |
| HGB                             | Any     | 3(12.50%)          | 0(0.00%)      | 0(0.00%)           | 1(12.50%)     | 4(16.67%)          | 0(0.00%)      | 7(9.72%)           | 1(4.17%)       |
|                                 | Grade 1 | 3(12.50%)          | 0(0.00%)      | 0(0.00%)           | 1(12.50%)     | 2(8.33%)           | 0(0.00%)      | 5(6.94%)           | 1(4.17%)       |
|                                 | Grade 2 | 0(0.00%)           | 0(0.00%)      | 0(0.00%)           | 0(0.00%)      | 2(8.33%)           | 0(0.00%)      | 2(2.78%)           | 0(0.00%)       |
|                                 | Grade 3 | 0(0.00%)           | 0(0.00%)      | 0(0.00%)           | 0(0.00%)      | 0(0.00%)           | 0(0.00%)      | 0(0.00%)           | 0(0.00%)       |
| ALT                             | Any     | 0(0.00%)           | 0(0.00%)      | 0(0.00%)           | 0(0.00%)      | 2(8.33%)           | 0(0.00%)      | 2(2.78%)           | 0(0.00%)       |
|                                 | Grade 1 | 0(0.00%)           | 0(0.00%)      | 0(0.00%)           | 0(0.00%)      | 2(8.33%)           | 0(0.00%)      | 2(2.78%)           | 0(0.00%)       |
|                                 | Grade 2 | 0(0.00%)           | 0(0.00%)      | 0(0.00%)           | 0(0.00%)      | 0(0.00%)           | 0(0.00%)      | 0(0.00%)           | 0(0.00%)       |
|                                 | Grade 3 | 0(0.00%)           | 0(0.00%)      | 0(0.00%)           | 0(0.00%)      | 0(0.00%)           | 0(0.00%)      | 0(0.00%)           | 0(0.00%)       |
| GLU                             | Any     | 0(0.00%)           | 0(0.00%)      | 3(12.50%)          | 0(0.00%)      | 0(0.00%)           | 0(0.00%)      | 3(4.17%)           | 0(0.00%)       |
|                                 | Grade 1 | 0(0.00%)           | 0(0.00%)      | 3(12.50%)          | 0(0.00%)      | 0(0.00%)           | 0(0.00%)      | 3(4.17%)           | 0(0.00%)       |
|                                 | Grade 2 | 0(0.00%)           | 0(0.00%)      | 0(0.00%)           | 0(0.00%)      | 0(0.00%)           | 0(0.00%)      | 0(0.00%)           | 0(0.00%)       |
|                                 | Grade 3 | 0(0.00%)           | 0(0.00%)      | 0(0.00%)           | 0(0.00%)      | 0(0.00%)           | 0(0.00%)      | 0(0.00%)           | 0(0.00%)       |
| TBIL                            | Any     | 1(4.17%)           | 7(87.50%)     | 5(20.83%)          | 1(12.50%)     | 0(0.00%)           | 2(25.00%)     | 6(8.33%)           | 10(41.67%)     |
|                                 | Grade 1 | 1(4.17%)           | 7(87.50%)     | 4(16.67%)          | 1(12.50%)     | 0(0.00%)           | 1(12.50%)     | 5(6.94%)           | 9(37.50%)      |
|                                 | Grade 2 | 0(0.00%)           | 0(0.00%)      | 1(4.17%)           | 0(0.00%)      | 0(0.00%)           | 1(12.50%)     | 1(1.39%)           | 1(4.17%)       |
|                                 | Grade 3 | 0(0.00%)           | 0(0.00%)      | 0(0.00%)           | 0(0.00%)      | 0(0.00%)           | 0(0.00%)      | 0(0.00%)           | 0(0.00%)       |
| PRO                             | Any     | 2(8.33%)           | 0(0.00%)      | 2(8.33%)           | 0(0.00%)      | 0(0.00%)           | 0(0.00%)      | 4(5.56%)           | 0(0.00%)       |
|                                 | Grade 1 | 1(4.17%)           | 0(0.00%)      | 2(8.33%)           | 0(0.00%)      | 0(0.00%)           | 0(0.00%)      | 3(4.17%)           | 0(0.00%)       |
|                                 | Grade 2 | 1(4.17%)           | 0(0.00%)      | 0(0.00%)           | 0(0.00%)      | 0(0.00%)           | 0(0.00%)      | 1(1.39%)           | 0(0.00%)       |
|                                 | Grade 3 | 0(0.00%)           | 0(0.00%)      | 0(0.00%)           | 0(0.00%)      | 0(0.00%)           | 0(0.00%)      | 0(0.00%)           | 0(0.00%)       |

Data are n (%). WBC, white blood cells; HGB, hemoglobin; ALT, alanine aminotransferase; BUN, blood urea nitrogen; AST, aspartate aminotransferase; GLU, blood glucose; TBIL, serum total bilirubin; PRO, urinary protein; U-GLU, urinary glucose. \* Elevations in white blood cell count following vaccination were observed.



**Appendix 14: Statistical Analysis of neutralizing antibody GMT in phase1/2 3~5 year-old group on day 0**

|       |                            | 2 µg group (n=111) |                | 4 µg group (n=112) |                | 8 µg group (n=112) |                |
|-------|----------------------------|--------------------|----------------|--------------------|----------------|--------------------|----------------|
|       |                            | Vaccination (n=83) | control (n=28) | Vaccination (n=84) | control (n=28) | Vaccination (n=84) | control (n=28) |
| Day 0 | Number of valid subjects   | 83                 | 28             | 84                 | 28             | 84                 | 28             |
|       | Geometric Mean             | 2                  | 2              | 2                  | 2              | 2                  | 2              |
|       | Lower 95%CI, Upper 95% CI  | 2,2                | 2,2            | 2,2                | 2,2            | 2,2                | 2,2            |
|       | Median                     | 2                  | 2              | 2                  | 2              | 2                  | 2              |
|       | Min, Max                   | 2,2                | 2,2            | 2,2                | 2,2            | 2,2                | 2,2            |
|       | t-test p-value vs. control | --                 | --             | --                 | --             | --                 | --             |
|       | t-test p-value vs. 4 µg    | --                 | --             | --                 | --             | --                 | --             |
|       | t-test p-value vs. 8 µg    | --                 | --             | --                 | --             | --                 | --             |

**Appendix 15: Statistical Analysis of neutralizing antibody GMT in phase1/2 3~5 year-old group on day 28**

|        |                            | 2 µg group (n=111) |                | 4 µg group (n=112) |                | 8 µg group (n=112) |                |
|--------|----------------------------|--------------------|----------------|--------------------|----------------|--------------------|----------------|
|        |                            | Vaccination (n=83) | control (n=28) | Vaccination (n=84) | control (n=28) | Vaccination (n=84) | control (n=28) |
| Day 28 | Number of valid subjects   | 83                 | 27             | 83                 | 27             | 83                 | 28             |
|        | Geometric Mean             | 14.4821            | 2              | 20.1867            | 2              | 21.3519            | 2              |
|        | Lower 95%CI, Upper 95% CI  | 11.2153, 18.7005   | 2,2            | 16.2849, 25.0234   | 2,2            | 17.5303, 26.0066   | 2,2            |
|        | Median                     | 12                 | 2              | 16                 | 2              | 20                 | 2              |
|        | Min, Max                   | 4,128              | 2,2            | 4,192              | 2,2            | 4,128              | 2,2            |
|        | t-test p-value vs. control | <0.001             | --             | <0.001             | --             | <0.001             | --             |
|        | t-test p-value vs. 4 µg    | 0.50               | --             | --                 | --             | --                 | --             |
|        | t-test p-value vs. 8 µg    | 0.80               | --             | 0.85               | --             | --                 | --             |

**Appendix 16: Statistical Analysis of neutralizing antibody GMT in phase1/2 3~5 year-old group on day 56**

|        |                            | 2 µg group (n=111) |                | 4 µg group (n=112) |                | 8 µg group (n=112) |                |
|--------|----------------------------|--------------------|----------------|--------------------|----------------|--------------------|----------------|
|        |                            | Vaccination (n=83) | control (n=28) | Vaccination (n=84) | control (n=28) | Vaccination (n=84) | control (n=28) |
| Day 56 | Number of valid subjects   | 82                 | 27             | 83                 | 26             | 83                 | 28             |
|        | Geometric Mean             | 105.3023           | 2              | 180.2401           | 2              | 170.9560           | 2              |
|        | Lower 95%CI, Upper 95% CI  | 90.9201, 121.9595  | 2,2            | 163.6719, 198.4855 | 2,2            | 155.8099, 187.5743 | 2,2            |
|        | Median                     | 96                 | 2              | 192                | 2              | 192                | 2              |
|        | Min, Max                   | 16,384             | 2,2            | 64,512             | 2,2            | 48,384             | 2,2            |
|        | t-test p-value vs. control | <0.001             | --             | <0.001             | --             | <0.001             | --             |
|        | t-test p-value vs. 4 µg    | <0.001             | --             | --                 | --             | --                 | --             |
|        | t-test p-value vs. 8 µg    | <0.001             | --             | 0.71               | --             | --                 | --             |

**Appendix 17: Statistical Analysis of neutralizing antibody GMT in phase1/2 3~5 year-old group on day 84**

|        |                            | 2 µg group (n=111) |                | 4 µg group (n=112) |                | 8 µg group (n=112) |                |
|--------|----------------------------|--------------------|----------------|--------------------|----------------|--------------------|----------------|
|        |                            | Vaccination (n=83) | control (n=28) | Vaccination (n=84) | control (n=28) | Vaccination (n=84) | control (n=28) |
| Day 84 | Number of valid subjects   | 82                 | 27             | 83                 | 26             | 83                 | 28             |
|        | Geometric Mean             | 143.5504           | 2              | 199.1137           | 2              | 224.3981           | 2              |
|        | Lower 95%CI, Upper 95% CI  | 124.3196, 165.7559 | 2,2            | 174.0670, 227.7644 | 2,2            | 202.1648, 249.0766 | 2,2            |
|        | Median                     | 128                | 2              | 192                | 2              | 256                | 2              |
|        | Min, Max                   | 48,768             | 2,2            | 48,768             | 2,2            | 64,768             | 2,2            |
|        | t-test p-value vs. control | <0.001             | --             | <0.001             | --             | <0.001             | --             |
|        | t-test p-value vs. 4 µg    | 0.0018             | --             | --                 | --             | --                 | --             |
|        | t-test p-value vs. 8 µg    | <0.001             | --             | 0.85               | --             | --                 | --             |

**Appendix 18: Statistical Analysis of neutralizing antibody GMT in phase1/2 6~12 year-old group on day 0**

|                         |                            | 2 µg group (n=112) |                | 4 µg group (n=112) |                | 8 µg group (n=112) |                    |  |
|-------------------------|----------------------------|--------------------|----------------|--------------------|----------------|--------------------|--------------------|--|
|                         |                            | vaccination (n=84) | control (n=28) | vaccination (n=84) | control (n=28) | control (n=28)     | Vaccination (n=84) |  |
| Day 0                   | Number of valid subjects   | 84                 | 28             | 84                 | 28             | 84                 | 28                 |  |
|                         | Geometric Mean             | 2                  | 2              | 2                  | 2              | 2                  | 2                  |  |
|                         | Lower 95%CI, Upper 95% CI  | 2,2                | 2,2            | 2,2                | 2,2            | 2,2                | 2,2                |  |
|                         | Median                     | 2                  | 2              | 2                  | 2              | 2                  | 2                  |  |
|                         | Min, Max                   | 2,2                | 2,2            | 2,2                | 2,2            | 2,2                | 2,2                |  |
|                         |                            |                    |                |                    |                |                    |                    |  |
|                         | t-test p-value vs. control | --                 | --             | --                 | --             | --                 | --                 |  |
|                         | t-test p-value vs. 4 µg    | --                 | --             | --                 | --             | --                 | --                 |  |
| t-test p-value vs. 8 µg | --                         | --                 | --             | --                 | --             | --                 |                    |  |

**Appendix 19: Statistical Analysis of neutralizing antibody GMT in phase1/2 6~12 year-old group on day 28**

|        |                            | 2 µg group (n=112) |                | 4 µg group (n=112) |                | 8 µg group (n=112) |                    |
|--------|----------------------------|--------------------|----------------|--------------------|----------------|--------------------|--------------------|
|        |                            | vaccination (n=84) | control (n=28) | vaccination (n=84) | control (n=28) | control (n=28)     | Vaccination (n=84) |
| Day 28 | Number of valid subjects   | 84                 | 28             | 84                 | 28             | 83                 | 28                 |
|        | Geometric Mean             | 29.9702            | 2              | 54.0703            | 2              | 55.7936            | 2                  |
|        | Lower 95%CI, Upper 95% CI  | 24.9888, 35.9447   | 2,2            | 45.6197, 64.0864   | 2,2            | 45.3101, 68.7027   | 2,2                |
|        | Median                     | 32                 | 2              | 48                 | 2              | 64                 | 2                  |
|        | Min, Max                   | 4,192              | 2,2            | 12,256             | 2,2            | 8,256              | 2,2                |
|        | t-test p-value vs. control | <0.001             | --             | <0.001             | --             | <0.001             | --                 |
|        | t-test p-value vs. 4 µg    | <0.001             | --             | --                 | --             | --                 | --                 |
|        | t-test p-value vs. 8 µg    | <0.001             | --             | 0.58               | --             | --                 | --                 |

**Appendix 20: Statistical Analysis of neutralizing antibody GMT in phase1/2 6~12 year-old group on day 56**

|        |                            | 2 µg group (n=112) |                | 4 µg group (n=112) |                | 8 µg group (n=112) |                    |
|--------|----------------------------|--------------------|----------------|--------------------|----------------|--------------------|--------------------|
|        |                            | vaccination (n=84) | control (n=28) | vaccination (n=84) | control (n=28) | control (n=28)     | Vaccination (n=84) |
| Day 56 | Number of valid subjects   | 83                 | 28             | 84                 | 27             | 83                 | 28                 |
|        | Geometric Mean             | 84.0707            | 2              | 168.6164           | 2              | 162.8219           | 2                  |
|        | Lower 95%CI, Upper 95% CI  | 72.6433, 97.2957   | 2,2            | 151.9886, 187.0633 | 2,2            | 145.6480, 182.0207 | 2,2                |
|        | Median                     | 96                 | 2              | 192                | 2              | 128                | 2                  |
|        | Min, Max                   | 16,256             | 2,2            | 48,512             | 2,2            | 32,512             | 2,2                |
|        | t-test p-value vs. control | <0.001             | --             | <0.001             | --             | <0.001             | --                 |
|        | t-test p-value vs. 4 µg    | <0.001             | --             | --                 | --             | --                 | --                 |
|        | t-test p-value vs. 8 µg    | <0.001             | --             | 0.80               | --             | --                 | --                 |

**Appendix 21: Statistical Analysis of neutralizing antibody GMT in phase1/2 6~12 year-old group on day 84**

|        |                            | 2 µg group (n=112) |                | 4 µg group (n=112) |                | 8 µg group (n=112) |                    |
|--------|----------------------------|--------------------|----------------|--------------------|----------------|--------------------|--------------------|
|        |                            | vaccination (n=84) | control (n=28) | vaccination (n=84) | control (n=28) | control (n=28)     | Vaccination (n=84) |
| Day 84 | Number of valid subjects   | 83                 | 28             | 84                 | 27             | 83                 | 28                 |
|        | Geometric Mean             | 126.9976           | 2              | 184.7821           | 2              | 175.7806           | 2                  |
|        | Lower 95%CI, Upper 95% CI  | 111.8506, 144.1960 | 2,2            | 162.4801, 210.1452 | 2,2            | 175.7806, 195.3714 | 2,2                |
|        | Median                     | 128                | 2              | 192                | 2              | 192                | 2                  |
|        | Min, Max                   | 16,512             | 2,2            | 48,768             | 2,2            | 64,768             | 2,2                |
|        | t-test p-value vs. control | <0.001             | --             | <0.001             | --             | <0.001             | --                 |
|        | t-test p-value vs. 4 µg    | <0.001             | --             | --                 | --             | --                 | --                 |
|        | t-test p-value vs. 8 µg    | <0.001             | --             | 0.58               | --             | --                 | --                 |



**Appendix 22: Statistical Analysis of neutralizing antibody GMT in phase1/2 13~17 year-old group on day 0**

|                         |                              | 2 µg group (n=112) |                | 4 µg group (n=112) |                | 8 µg group (n=112) |                    |
|-------------------------|------------------------------|--------------------|----------------|--------------------|----------------|--------------------|--------------------|
|                         |                              | vaccination (n=84) | control (n=28) | vaccination (n=84) | control (n=28) | control (n=28)     | Vaccination (n=84) |
| Day 0                   | Number of valid subjects     | 84                 | 28             | 84                 | 28             | 84                 | 28                 |
|                         | Geometric Mean               | 2                  | 2              | 2                  | 2              | 2                  | 2                  |
|                         | Lower 95%CI,<br>Upper 95% CI | 2,2                | 2,2            | 2,2                | 2,2            | 2,2                | 2,2                |
|                         | Median                       | 2                  | 2              | 2                  | 2              | 2                  | 2                  |
|                         | Min, Max                     | 2,2                | 2,2            | 2,2                | 2,2            | 2,2                | 2,2                |
|                         |                              |                    |                |                    |                |                    |                    |
|                         | t-test p-value vs. control   | --                 | --             | --                 | --             | --                 | --                 |
|                         | t-test p-value vs. 4 µg      | --                 | --             | --                 | --             | --                 | --                 |
| t-test p-value vs. 8 µg | --                           | --                 | --             | --                 | --             | --                 |                    |

**Appendix 23: Statistical Analysis of neutralizing antibody GMT in phase1/2 13~17 year-old group on day 28**

|        |                            | 2 µg group (n=112) |                | 4 µg group (n=112) |                | 8 µg group (n=112) |                    |
|--------|----------------------------|--------------------|----------------|--------------------|----------------|--------------------|--------------------|
|        |                            | vaccination (n=84) | control (n=28) | vaccination (n=84) | control (n=28) | control (n=28)     | Vaccination (n=84) |
| Day 28 | Number of valid subjects   | 84                 | 28             | 83                 | 26             | 84                 | 28                 |
|        | Geometric Mean             | 48.0065            | 2              | 61.4127            | 2              | 80.2357            | 2                  |
|        | Lower 95%CI, Upper 95% CI  | 42.4591, 54.2786   | 2,2            | 52.1449, 72.3276   | 2,2            | 69.3001, 92.8968   | 2,2                |
|        | Median                     | 48                 | 2              | 64                 | 2              | 96                 | 2                  |
|        | Min, Max                   | 12,192             | 2,2            | 4,512              | 2,2            | 8,256              | 2,2                |
|        | t-test p-value vs. control | <0.001             | --             | <0.001             | --             | <0.001             | --                 |
|        | t-test p-value vs. 4 µg    | 0.0053             | --             | --                 | --             | --                 | --                 |
|        | t-test p-value vs. 8 µg    | <0.001             | --             | 0.25               | --             | --                 | --                 |

**Appendix 24: Statistical Analysis of neutralizing antibody GMT in phase1/2 13~17 year-old group on day 56**

|        |                            | 2 µg group (n=112) |                | 4 µg group (n=112) |                | 8 µg group (n=112) |                    |
|--------|----------------------------|--------------------|----------------|--------------------|----------------|--------------------|--------------------|
|        |                            | vaccination (n=84) | control (n=28) | vaccination (n=84) | control (n=28) | control (n=28)     | Vaccination (n=84) |
| Day 56 | Number of valid subjects   | 84                 | 28             | 83                 | 26             | 84                 | 28                 |
|        | Geometric Mean             | 88.0373            | 2              | 155.7459           | 2              | 147.9686           | 2                  |
|        | Lower 95%CI, Upper 95% CI  | 77.8571, 99.5485   | 2,2            | 137.4294, 176.5036 | 2,2            | 131.9985, 165.8709 | 2,2                |
|        | Median                     | 96                 | 2              | 192                | 2              | 192                | 2                  |
|        | Min, Max                   | 24,384             | 2,2            | 48,512             | 2,2            | 32,384             | 2,2                |
|        | t-test p-value vs. control | <0.001             | --             | <0.001             | --             | <0.001             | --                 |
|        | t-test p-value vs. 4 µg    | <0.001             | --             | --                 | --             | --                 | --                 |
|        | t-test p-value vs. 8 µg    | <0.001             | --             | 0.53               | --             | --                 | --                 |

**Appendix 25: Statistical Analysis of neutralizing antibody GMT in phase1/2 13~17 year-old group on day 84**

|        |                            | 2 µg group (n=112) |                | 4 µg group (n=112) |                | 8 µg group (n=112) |                    |
|--------|----------------------------|--------------------|----------------|--------------------|----------------|--------------------|--------------------|
|        |                            | vaccination (n=84) | control (n=28) | vaccination (n=84) | control (n=28) | control (n=28)     | Vaccination (n=84) |
| Day 84 | Number of valid subjects   | 84                 | 28             | 83                 | 26             | 84                 | 28                 |
|        | Geometric Mean             | 150.7355           | 2              | 198.9887           | 2              | 192.1453           | 2                  |
|        | Lower 95%CI, Upper 95% CI  | 134.1534, 169.3671 | 2,2            | 180.6011, 219.2485 | 2,2            | 175.3180, 210.5878 | 2,2                |
|        | Median                     | 128                | 2              | 192                | 2              | 192                | 2                  |
|        | Min, Max                   | 32,512             | 2,2            | 96,512             | 2,2            | 64,512             | 2,2                |
|        | t-test p-value vs. control | <0.001             | --             | <0.001             | --             | <0.001             | --                 |
|        | t-test p-value vs. 4 µg    | 0.0053             | --             | --                 | --             | --                 | --                 |
|        | t-test p-value vs. 8 µg    | 0.011              | --             | 0.53               | --             | --                 | --                 |
